# Supplementary material for: CDKL3 is a targetable regulator of cell cycle progression in cancers
Source: JCI journal article supplement (doi:10.1172/jci178428), 2024-07-04
Supplement: sd2 [file 2]

301 Moved Permanently

# Moved Permanently

The document has moved here.
