# Supplementary material for: CDKL3 is a targetable regulator of cell cycle progression in cancers
Source: JCI journal article supplement (doi:10.1172/jci178428), 2024-07-04
Supplement: sd2 [file 2]

## **CDKL3 is a targetable regulator of cell cycle progression in cancers**

Haijiao Zhang, Jiahui Lin, Shaoqin Zheng, Lanjing Ma, Zhongqiu Pang, Hongyi Yin, Chengcheng Meng, Yinuo Wang, Qing Han, Xi Zhang, Zexu Li, Liu Cao, Lijun Liu, Teng Fei, Daming Gao, Liang Yang, Xueqiang Peng, Chen Ding, Shixue Wang, Ren Sheng

## **Supplemental Materials**

**Supplemental Methods**

**Supplemental Figure 1 to 8**

**Supplemental Table 1 and 2**

**References**

## **Supplemental Methods**

### **Subcutaneous tumor transplantation**

DLD-1 cells were trypsinized and resuspended by PBS and held at 4°C. A density of  $1 \times 10^6$  DLD-1 cells were subcutaneously injected into nude mice (Beijing HFK Bioscience CO., LTD) at per site. Trypan blue was used to determine the number and viability of the designed cells.

### **Clones and constructs**

All plasmids were listed in [Supplemental Table 2](#). Plasmids were transformed in *E.coli* NEB®5α strain for amplification and extracted by OMEGA Endo-free Plasmid Mini Kit. Thermo Nanodrop 2000 was used to determine the concentrations of all plasmids.

### **Flow cytometry assay**

To analyze DNA content, cells were incubated with 50μM BrdU in media for 1 hour, fixed with 70% ethanol and kept at 4°C for at least 30 minutes. The cells were washed twice with cold PBS, followed by 1.5M HCl, 0.5% Triton X-100 in PBS for 30 minutes at room temperature. The cells were washed twice with cold PBS again, and then resuspended in 0.1M NaB<sub>4</sub>O<sub>7</sub> (pH 8.5), and washed twice again with cold PBS. BrdU immunolabeling was performed with anti-BrdU mAb (Cell Signaling Technology, 1:200) for 1 hour. The cells were washed twice with cold PBS, and then bound with a fluorescent secondary antibody (Invitrogen, 1:500) for 30 minutes. Cells were treated with 200 μg/mL RNase A and 20mg/mL of propidium iodide (PI) in PBS at 37°C for 45 minutes. Cell cycle analysis was performed using BD LSR-Fortessa flow cytometer. For the quantitative analysis, the unstained cells were used to determine the proper forward scattering (FSC) and side scattering (SSC) at the beginning. Next, PI-A (area) /PI-W (width) was used to circle the single cells. The 2N-centered cluster with low BrdU staining is considered as G0/G1 cluster (1-3). The 4N-centered cluster is considered as G2/M cluster. The contents between 2N and 4N and with high BrdU staining are considered as S phase.

For combined RNA and DNA analysis, freshly ethanol-fixed cells were resuspended in 1mL of 20mg/mL of PI and 1μg/mL Pyronin Y in PBS, and incubated for 40 minutes at 37°C. Cell cycle analysis was performed using BD LSR-Fortessa flow cytometer, and analysis was performed using FlowJo version 10.0.7r2. For the quantitative analysis, the G0/G1 and G2/M clusters were separated based on the DNA content at 2N and 4N, respectively. The contents in between are considered as S phase (4-6). At the left boundary of S phase, a horizontal line was drawn to show the bottom-left corner of S phase and to separate high and low RNA-contents. High-RNA-content cells in the top-left quadrant (adjacent to S-phased cells) were considered as G1-phased cells which had prepared sufficient RNA to enter S phase. Bottom-left quadrant cells were defined as G0 cells due to the low RNA content and lack of continuity with S-phased cells.

### **Cycloheximide-blocking assay**

Cells were cultured in 24-well plates and treated with cycloheximide (CHX) 300μg/mL at the indicated times. After washed by PBS, cells were prepared for immunoblotting as described above.

### **Knockdown assay using small interfering RNAs (siRNAs)**

After DLD-1 cells grew to 70% to 80% confluence in 6-well plates with DMEM

supplemented with 10% FBS, transfection solution was configured as follows: *CCND1/CCND2/CCND3* siRNA were added into 60  $\mu$ L reagent A (final concentration of each siRNA was 20 nM), and 8  $\mu$ L reagent B (D-Nano Therapeutics) was added into the solution. After mixing, the solution was incubated for 5 minutes at RT. Appropriate volume of growth medium was added into the solution to a final volume of 200  $\mu$ L. The transfection solution was added into plates. Cells were incubated in humidified incubators with 5% CO<sub>2</sub> at 37°C for 48 hours.

#### **Cell transfection**

Transfection was done using Neofect. Transient cDNA transfection was performed using Neofect according to the specification. Plasmids were diluted using DMEM and mixed with Neofect. The complexes were incubated for 20 minutes at room temperature (RT) and added to HEK293T cells via growth medium. After 24 hours, the medium was replaced by fresh medium.

#### **Lentivirus production and infection**

For lentivirus production, psPAX2 vector (Addgene), pCMV-VSV-G (Addgene), the desired customized Lenti-EF1 $\alpha$ -puro plasmids, pLKO plasmids, Lenti-Cas9-puro sgCDKL3, sgCDK4 and other lentiviral vector-based plasmids were co-transfected in HEK293T cell by the ratio of 5:1:5 in mass (ng). Medium with lentivirus was collected and used to infect corresponding cells.

For lentiviral infection, 0.5-1mL medium with lentivirus was collected and added to 1mL fresh medium with polybrene (Santa Cruz Biotech, 1:1,000). After 48 hours, resistance selection was done by refreshing the medium with puromycin or blastomycin (Invivogen).

#### **Cell line generation**

CDKL3 KO cell line: At least three sgRNA sequences were designed and cloned into the Lenti-Cas9-puro vector (Addgene). U2OS, DLD-1 and HeLa cell pools stably expressing different Lenti-Cas9-puro-sgCDKL3 were generated after lentivirus infection and puromycin resistance selection. Subsequently, immunoblotting was determined by CDKL3 antibodies to determine cell pools. Other KO cell lines were generated by the same approach.

#### **Knockdown assay using small interfering RNAs (siRNAs)**

After DLD-1 cells grew to 70% to 80% confluence in 6-well plates with DMEM supplemented with 10% FBS, transfection solution was configured as follows: *CCND1/CCND2/CCND3* siRNA were added into 60  $\mu$ L reagent A (final concentration of each siRNA was 20 nM), and 8  $\mu$ L reagent B (D-Nano Therapeutics) was added into the solution. After mixing, the solution was incubated for 5 minutes at RT. Appropriate volume of growth medium was added into the solution to a final volume of 200  $\mu$ L. The transfection solution was added into plates. Cells were incubated in humidified incubators with 5% CO<sub>2</sub> at 37°C for 48 hours.

#### **Co-immunoprecipitation**

For co-immunoprecipitation, total lysates of cells were incubated with Protein G-agarose (or followed by CDK4 antibody incubation, 1:100),  $\alpha$ -FLAG-agarose,  $\alpha$ -MYC-agarose or  $\alpha$ -HA-agarose overnight at 4°C. The next day, the resins were washed thoroughly for 5 times with PLB, incubated with shaking for 10 minutes each time at

4°C, resuspended in SDS loading buffer, boiled at 95°C for 5 minutes, and used for the immunoblotting.

#### **In vitro kinase assay**

FLAG-CDKL3, MYC-cyclin A2, B1, D1 and E1 were transfected in HEK293T cells for 48 hours. And the cells were starved in FBS-free medium for 8 hours. The cells were then lysed and the expressed proteins were enriched on  $\alpha$ -FLAG-agarose or  $\alpha$ -MYC-agarose. Next, corresponding peptides (500 $\mu$ g/mL) were added to the agarose-containing solution for elution. The substrate required for the reaction was obtained as described (see in vitro protein purification). A 30 $\mu$ L reaction system (0.1mM ATP, 2mM DTT, 50mM HEPES, 0.01M MgCl<sub>2</sub>, suitable volume of substrate and kinase) was incubated at 37°C for 30 minutes, and terminated by 95°C boiling for 5 minutes. The samples were then subjected to immunoblot.

#### **Colon cancer patient-derived organoids culture**

Fresh colon cancer patient tumor tissues were obtained by surgery (Department of General Surgery, Fourth Affiliated Hospital, China Medical University, Shenyang 110032, China) and stored in the Advanced DMEM/F-12 (Gibco). The general protocol was followed as described (7).

#### **Immunofluorescence assay**

Cells were seeded onto glass coverslips and fixed by 4% paraformaldehyde (PFA) in PBS for 15 minutes at 37°C. They were then incubated in 0.5% Triton X-100 in PBS for 30 minutes at RT, followed by anti-CDKL3 antibody (1:400 in the buffer, 12 to 16 hours, 4°C), and bound with a fluorescent secondary antibody for 30 minutes. Rinsed by PBS 3 times, coverslips were incubated with Hoechst (Invitrogen) at RT. Cells were visualized by inverted confocal microscopy. Regarding the immunofluorescence of BrdU, cells were incubated with 10 $\mu$ M BrdU in media for 1 hour and then fixed in 4% PFA and kept at 4°C for 15 minutes. The cells were washed twice with PBS, followed by 1M HCl, 0.2% Triton X-100 in PBS for 20 minutes at RT, and then resuspended the cells with 0.1M NaB<sub>4</sub>O<sub>7</sub> (pH 8.5), allowing them to stand for 30 minutes. The cells were washed twice with cold PBS. BrdU immunolabeling was performed with anti-BrdU mAb (Cell Signaling Technology, 1:200) for 1 hour. The cells were washed twice with cold PBS, and then bound with secondary antibody (Invitrogen, 1:500) for 30 minutes. Then, fluorescence images were taken using a Leica TCS SP8.

#### **Ubiquitination assay**

For ubiquitination assay, indicated V5-ubiquitin plasmids and corresponding plasmids were co-transfected in HEK293T cells for 48 hours. Before lysed by PLB, cells were treated with MG132 (10 $\mu$ M) for 6 hours to maintain the same protein levels.

#### **Reverse transcription and quantitative real-time PCR**

For RT-qPCR, total RNA from cells was isolated and obtained by UNIQ-10 Column Trizol Total RNA Isolation Kit (Sangon Biotech). Total RNA was reverse transcribed into cDNA using MonScript™ RTIII All-in-One Mix (Monad) following the manufacturer's specification. Quantitative RT-PCR were performed using MonAmp™ ChemoHS qPCR Mix (Monad). All primers were designed based on the primer bank of Massachusetts General Hospital (<https://pga.mgh.harvard.edu/cgi-bin/primerbank>). Primer sequences are listed in [Supplemental Table 2](#). All experiments were performed

in triplicate. The expression values were normalized to those of *GAPDH*.

### **Double thymidine block**

After the cells grew to 30% to 40% confluence in 24-well plates with DMEM supplemented with 10% FBS, thymidine was added at the concentration of 2mM. After cultured at 37°C for 16 hours, cells were gently rinsed with PBS to remove thymidine and DMEM supplemented with 10% FBS was added. After 9 hours, second round of thymidine was added at a concentration of 2mM for another 16 hours. At this point cells were at G1/S boundary. To release, cells were washed with PBS and incubated with fresh media. After incubating for the corresponding time, cells were collected for immunoblotting.

### **FBS starvation release assay**

After the cells grew to 40% to 60% confluence, the cells were gently rinsed 3 times with PBS to remove FBS contents from the cell surface, and FBS was withdrawn for 24 hours. Then, medium containing FBS were replaced as indicated.

### **Chemical treatments**

Cdk1/2 Inhibitor III was dissolved in DMSO with a concentration of 25mM as stock solution. Cells were treated at a final concentration of 1.2 $\mu$ M. 5 $\mu$ M was used for in vitro kinase assay.

Palbociclib was dissolved in DMSO with a concentration of 100mM as stock solution. Cells were treated with Palbociclib at a final concentration of 0.8 $\mu$ M. 5 $\mu$ M was used for in vitro kinase assay.

Thymidine was dissolved in ddH<sub>2</sub>O with a concentration of 200mM. Cells were treated with Thymidine at a final concentration of 2mM.

ASC67 was dissolved in DMSO with a concentration of 300mM as stock solution. For IC<sub>50</sub> assay, cells were treated at a concentration range from 0 to 300 $\mu$ M. For in vitro kinase assay, the concentration ranging from 0 to 0.5 $\mu$ M was used.

The inhibitor C3I-22 (HZ1) was dissolved in DMSO with a concentration of 300mM as stock solution. For IC<sub>50</sub> assay, cells were treated with a concentration range from 0 to 300 $\mu$ M. For in vitro kinase assay, the concentration ranging from 0 to 0.1 $\mu$ M was used. Organoids derived from colon cancer patients were treated with a concentration range from 0 to 5 $\mu$ M. Balb/cA-nude and C57BL/6J-*Apc*<sup>min/+</sup> mice were treated with a concentration of 1mg/kg (suspended in PBS) through oral gavage.

Other C3I inhibitors were dissolved in DMSO with a concentration of 200mM as stock solution.

### **In vitro protein purification**

GST-tagged proteins were transformed into *E. coli* BL21 competent cells, and then protein expression was induced by adding IPTG (Beyotime Biotechnology) at 18°C for 6 to 10 hours. The bacterial culture was centrifuged (600xg, 10 min, 4°C), and the pellets were resuspended in 20mL lysis buffer (50mM Tris-HCl, 300mM NaCl, and 10% (v/v) glycerol, 1mM PMSF, pH 7.9) and sonicated with 50% power on a SCIENTZ JY92-IIN sonicator for 20 minutes (5 seconds per time, with an interval of 5 seconds). The solution was centrifuged again after sonication (10,000xg, 15 min, 4°C) and the supernatant was collected. An appropriate amount of GST resins was added to the supernatant and the mixture was rotated for 2 to 3 hours at 4°C. The beads were

washed 3 times and the volume to 1mL with TBS was set. The preparation of His-tagged protein was similar to GST-tagged protein. Ni-NTA resin was used for enrichment of His-tagged proteins, followed by protein elution with imidazole (200mM). And the imidazole was removed by overnight dialysis in TBS at 4°C.

#### **In vitro ubiquitination assay**

The ubiquitination assay was performed using the ubiquitination kit (Enzo Life Science). A 50µL reaction mixture was prepared as follow: 10× ubiquitination buffer, 50mM DTT, 0.1M Mg-ATP, 20×E1 (His6-tagged recombinant human ubiquitin-activating enzyme), 10×E2 (His6-tagged recombinant human ubiquitin-conjugating enzyme UbcH5b), 1µM E3 (His-Trim28 or His-Trim28 C65/68A.), 20×biotinylated ubiquitin, and appropriate target protein (GST-CDK4). After incubating for 1 hour at 37°C, the reaction was terminated by 95°C for 5 minutes. The samples were then subjected to immunoblotting.

#### **In vitro competition assay**

For in vitro competition assay, His-tagged and GST-tagged protein were prepared as previously mentioned. Ni-NTA and GST resins were used to enrich corresponding His-tagged and GST-tagged proteins for 2 hours at 4°C, respectively. Then GST-tagged proteins were eluted by reduced glutathione from the GST resins and dialyzed overnight. The appropriate amount of the first GST-tagged protein was incubated with Ni-NTA resin enriched by His-tagged cyclin A2 at 4°C for 2 hours and then different concentrations of another GST-tagged protein was added into the mixture and incubated at 4°C for 2 hours for the competition. After removing the supernatant by centrifugation, the Ni-NTA beads were then washed with TBS for 3 times, incubated with shaking for 5 minutes each time at 4°C, resuspended in SDS loading buffer, boiled at 95°C for 5 minutes, and used for the immunoblotting.

#### **Methyl thiazolyl tetrazolium (MTT) assay for cell proliferation**

Cells were seeded on 96-well plates at a density of 1,500 cells per well in triplicate and incubated for 1-8 days. After seeding, cell density was measured on Day 2, 4, 6, and 8 by adding 10µL thiazolyl blue tetrazolium (MTT; Sigma) at a dose of 0.5mg/mL per well. After 37°C incubation of 4 hours, MTT was removed and 100µL DMSO per well was added for another 10 minutes incubation. Plates ready for testing were measured by Biotek Synergy H1 plate reader at OD<sub>490</sub>. According to OD<sub>490</sub> values, the growth curves were plotted. Statistical analysis was done by two-way ANOVA in Prism 8.0.

#### **Colony formation assay**

The U2OS and DLD-1 cells were seeded in soft agar in 6-well plates at a density of 1,500 cells per well and cultured for 14 days for colony formation. After the clones grew into certain sizes and numbers, the wells were washed with PBS and fixed with 4% PFA at 37°C for 20 minutes. The wells were stained with 0.5% crystal violet for 30 minutes at RT, gently washed with ddH<sub>2</sub>O several times to remove the background and photographed by digital camera. All assays were performed in triplicate.

#### **Establishment of Palbociclib-resistant cells**

MCF7 and T47D cells were cultured in DMEM medium (containing 10% FBS) supplemented with different concentrations of Palbociclib for over 3 months. The concentration of Palbociclib ranged from 100 nM to 10 µM. For all experiments, the resistant cells were cultured with fresh DMEM medium (with 10% FBS) without

Palbociclib for 72h before treatment.

### Synthesis of compounds

Synthesis of 2-chloro-*N*-(3-cyclopentyl-1*H*-pyrazol-5-yl)pyrimidin-4-amine (3):

To a solution of 2,4-dichloropyrimidine (2) (447 mg, 3.0 mmol, 1.0 eq) in anhydrous DMSO (10 mL) was added 3-cyclopentyl-1*H*-pyrazol-5-aminetriethylamine (1) (500 mg, 3.3 mmol, 1.1 eq) and *N,N*-diisopropylethylamine (0.8 mL, 4.5 mmol, 1.5 eq). The solution was heated at 60°C for 24 hours. The reaction mixture was concentrated in vacuum, the residue was purified by column chromatography using CH<sub>2</sub>Cl<sub>2</sub>/MeOH as eluent giving 3 (650 mg) in 82% yield. <sup>1</sup>H NMR (400 MHz, DMSO-*d*<sub>6</sub>): δ 12.17 (s, 1H), 10.27 (s, 1H), 8.15 (s, 1H), 3.01 (m, 1H), 1.99 (m, 2H), 1.51-1.72 (m, 6H).

Synthesis of 2-(4-((4-((3-cyclopentyl-1*H*-pyrazol-5-yl)amino)pyrimidin-2-yl)amino)phenyl)acetonitrile (ASC67):

To a solution of 3 (200 mg, 0.76 mmol, 1.0 eq) in *n*-BuOH (8 mL) was added 2-(4-aminophenyl)acetonitrile (102 mg, 0.76 mmol, 1.0 eq) and concentrated hydrochloric acid (0.1 mL) in a sealed tube. The solution was heated at 100°C for 24 hours. The reaction mixture was concentrated in vacuum, the residue was purified by column chromatography using CH<sub>2</sub>Cl<sub>2</sub>/MeOH as eluent giving ASC67 (200 mg) in 73% yield. <sup>1</sup>H NMR (400 MHz, DMSO-*d*<sub>6</sub>): δ 11.98 (s, 1H), 9.50 (s, 1H), 9.12 (s, 1H), 7.98 (s, 1H), 7.77 (dd, *J* = 8 Hz, 2H), 7.22 (dd, *J* = 8 Hz, 2H), 6.47 (br, 1H), 6.31 (br, 1H), 3.93 (s, 2H), 3.02 (m, 1H), 2.01 (m, 2H), 1.54-1.72 (m, 6H).

Synthesis of 1-(4-((4-((3-cyclopentyl-1*H*-pyrazol-5-yl)amino)pyrimidin-2-yl)amino)phenyl)ethan-1-one (C3I-22, aka HZ1):

To a solution of 3 (100 mg, 0.38 mmol, 1.0 eq) in *n*-BuOH (4 mL) was added 1-(4-aminophenyl)ethan-1-one (52 mg, 0.38 mmol, 1.0 eq) and concentrated hydrochloric acid (0.05 mL) in a sealed tube. The solution was heated at 100°C for 24 hours. The reaction mixture was concentrated in vacuum, the residue was purified by column chromatography using CH<sub>2</sub>Cl<sub>2</sub>/MeOH as eluent giving C3I-22 (HZ1, 95 mg) in 70% yield. <sup>1</sup>H NMR (400 MHz, CD<sub>3</sub>OD): δ 8.01 (br, 1H), 7.95 (dd, *J* = 8 Hz, 2H), 7.83 (dd, *J* = 8 Hz, 2H), 6.44 (br, 1H), 6.28 (br, 1H), 3.10 (m, 1H), 2.56 (s, 3H), 2.09 (m, 2H), 1.62-1.80 (m, 6H).

Synthesis of 4-((4-((3-cyclopentyl-1*H*-pyrazol-5-yl)amino)pyrimidin-2-yl)amino)benzonitrile (C3I-42):

To a solution of 3 (100 mg, 0.38 mmol, 1.0 eq) in *n*-BuOH (4 mL) was added 4-aminobenzonitrile (45 mg, 0.38 mmol, 1.0 eq) and concentrated hydrochloric acid (0.05 mL) in a sealed tube. The solution was heated at 100°C for 24 hours. The reaction mixture was concentrated in vacuum, and the residue was purified by column chromatography using CH<sub>2</sub>Cl<sub>2</sub>/MeOH as eluent giving C3I-42 (45 mg) in 35% yield. <sup>1</sup>H NMR (400 MHz, CD<sub>3</sub>OD): δ 8.02 (br, 1H), 7.89 (dd, *J* = 8 Hz, 2H), 7.59 (dd, *J* = 8 Hz, 2H), 6.46 (br, 1H), 6.22 (br, 1H), 3.10 (m, 1H), 2.10 (m, 2H), 1.62-1.81 (m, 6H).

Synthesis of 2-(4-((4-((3-cyclopentyl-1*H*-pyrazol-5-yl)amino)pyrimidin-2-yl)amino)phenyl)ethan-1-ol (C3I-50):

To a solution of 3 (100 mg, 0.38 mmol, 1.0 eq) in *n*-BuOH (4 mL) was added 2-(4-aminophenyl)ethan-1-ol (50 mg, 0.38 mmol, 1.0 eq) and concentrated hydrochloric acid (0.05 mL) in a sealed tube. The solution was heated at 100°C for 24 hours. The

reaction mixture was concentrated in vacuum, and the residue was purified by column chromatography using CH<sub>2</sub>Cl<sub>2</sub>/MeOH as eluent giving C3I-50 (110 mg) in 80% yield. <sup>1</sup>H NMR (400 MHz, DMSO-*d*<sub>6</sub>): δ 11.94 (s, 1H), 9.46 (s, 1H), 8.93 (s, 1H), 7.94 (s, 1H), 7.60 (dd, *J* = 8 Hz, 2H), 7.08 (dd, *J* = 8 Hz, 2H), 6.42 (br, 1H), 6.34 (br, 1H), 4.60 (t, *J* = 8 Hz, 1H), 3.59 (q, *J* = 8 Hz, 2H), 3.01 (m, 1H), 2.66 (t, *J* = 8 Hz, 2H), 1.99 (m, 2H), 1.61-1.72 (m, 6H).

Synthesis of 4-((4-((3-cyclopentyl-1H-pyrazol-5-yl)amino)pyrimidin-2-yl)amino)benzoic acid (C3I-22-1):

To a solution of 3 (100 mg, 0.38 mmol, 1.0 eq) in 1,4-dioxane (4 mL) was added 4-aminobenzoic acid (53 mg, 0.38 mmol, 1.0 eq) and concentrated hydrochloric acid (0.05 mL) in a sealed tube. The solution was heated at 100°C for 24 hours. The reaction mixture was concentrated in vacuum, and the residue was purified by column chromatography using CH<sub>2</sub>Cl<sub>2</sub>/MeOH as eluent giving C3I-22-1 (98 mg) in 72% yield. <sup>1</sup>H NMR (400 MHz, DMSO-*d*<sub>6</sub>): δ 12.40 (br, 1H), 10.29 (br, 1H), 8.01 (s, 1H), 7.94 (dd, *J* = 8 Hz, 2H), 7.76 (dd, *J* = 8 Hz, 2H), 6.54 (br, 1H), 6.20 (br, 1H), 2.97 (m, 1H), 1.99 (m, 2H), 1.61-1.72 (m, 6H).

Synthesis of *N*<sup>2</sup>-(4-(2-aminoethyl)phenyl)-*N*<sup>4</sup>-(3-cyclopentyl-1H-pyrazol-5-yl)pyrimidine-2,4-diamine (C3I-22-2):

To a solution of 3 (100 mg, 0.38 mmol, 1.0 eq) in *n*-BuOH (4 mL) was added *tert*-butyl (4-aminophenethyl)carbamate (90 mg, 0.38 mmol, 1.0 eq) and concentrated hydrochloric acid (0.05 mL) in a sealed tube. The solution was heated at 100°C for 24 hours. The reaction mixture was concentrated in vacuum, and the residue was washed with diethyl ether to afford C3I-22-2 (80 mg) in 58% yield. <sup>1</sup>H NMR (400 MHz, DMSO-*d*<sub>6</sub>): δ 11.95 (s, 1H), 9.48 (s, 1H), 8.95 (s, 1H), 7.96 (d, *J* = 4 Hz, 1H), 7.63 (dd, *J* = 8 Hz, 2H), 7.08 (dd, *J* = 8 Hz, 2H), 6.38 (br, 2H), 2.99 (m, 1H), 2.74 (t, *J* = 8 Hz, 2H), 2.57 (t, *J* = 8 Hz, 2H), 1.99 (m, 2H), 1.60-1.72 (m, 6H).

### **Synthesis of C3I-PEG3-Biotin and streptavidin pull-down assay of cellular contents**

C3I-50 and Br-PEG3-Biotin react in DMF at the presence of K<sub>2</sub>CO<sub>3</sub> to obtain C3I-PEG3-Biotin. Cells were co-incubated with 100nM C3I-PEG3-Biotin or PEG3-Biotin (as negative control) for 6 hrs at 37°C, followed by cell lysis with PLB. After centrifugation, the supernatant was subjected to dialysis (12,000 Da) for 4 hrs. The remaining solution in the dialysis bag was then subjected to streptavidin-conjugated resin for incubation at 4°C for 2hrs. After three times of washing, the resins were boiled in SDS buffer. And the supernatant was subjected to SDS-PAGE and WB detection.

### **Growth of cells in athymic nude mouse and treatment of tumor tissues**

Seventy 6-week-old female athymic nude mice (purchased from Beijing HFK Biotechnology Co., Ltd.) were divided into 7 groups randomly (10 mice per group). DLD-1 cells were trypsinized and resuspended by PBS and kept on ice. 1×10<sup>6</sup> DLD-1 cells were subcutaneously injected on the backs of mice. When tumors emerged subcutaneously, C3I-22 (suspended in PBS) or the same volume of PBS was given through oral gavage daily for 12-14 days. The size of tumor was measured every 2 days. Tumor volume was calculated using the formula: ½ (Length × Width<sup>2</sup>). At the end of the experiment, mice were sacrificed and tumors were removed, weighed and



evaluated by immunohistochemistry.

Tumor tissues were lysed by using RIPA lysis buffer (Cowin Bio) containing protease inhibitor cocktail (Roche) and phosphatase inhibitor cocktail (Cowin Bio), and then total protein concentration was measured by using the BCA Kit (Thermo).

### **Immunohistochemistry**

Human patient and mouse tissue samples for immunohistochemistry were fixed in 10% formalin, embedded in paraffin, sectioned, deparaffinized, submerged in citric acid (pH 6.0) and microwaved for antigen retrieval. After cooling to RT, according to the manufacturer's instruction, the sections were treated with 3% hydrogen peroxide, 10% goat serum, and corresponding primary antibodies (1:400 or 1:600). HRP Envision Systems (DAB Kit, MXB Biotechnologies) was used to stain. After sealing with neutral balsam, sections were analyzed with dissecting microscope (Leica DM4000). Hematoxylin and Eosin (Sangon Biotech) staining was done according to the manufacturer's instructions.

A semi-quantitative scoring method was used to assess the expression of targeted protein. The staining intensity was divided into 0 (no staining), 1 (weak staining), 2 (moderate) and 3 (strong). The percentage of cells stained was categorized as 0 (0-5%), 1 (6-25%), 2 (26-50%), 3 (51-75%), and 4 (76%-100%). The final scores were generated by multiplying the staining intensity by percentage of cells.

### **Organoids immunofluorescence analysis**

Organoids sample embedded in Matrigel gel were fixed with 4% PFA (30 minutes, RT). Fixed organoids were collected and centrifuged (800 rpm, 5 minutes) to remove PFA and washed with ultrapure water. Following resuspension in ultrapure water, organoids were spread evenly over adherent slides. Subsequently, organoids spread on adherent slides were permeabilized with 0.2% Triton X-100 in PBS (1 hour, RT) and blocked for 3 hours using 10% goat serum containing 0.01% Triton X-100. Primary antibodies Ki67 (1:50; CST) was subsequently incubated overnight at 4°C. Following at least three washes with PBS the following day, samples were incubated with secondary antibodies (1:1,000; Invitrogen) for 2 hours at 4°C. Following at least three PBS washes, the stained organoids were imaged in confocal microscope (DM6000CS, Leica).

### **Surface plasmon resonance analysis**

Surface plasmon resonance (SPR) assays were performed using a Biacore T200 (Becton Dickinson and Company). In SPR experiments, purified CDKL3 were coupled to CM5 chips by a standard amine-coupling procedure in 10 mM sodium acetate (pH 4.5). Compounds were serially diluted and injected onto a sensor chip at a flow rate of 15µL/min for 90 seconds (contact phase), followed by 180 seconds of buffer flow (dissociation phase). The K<sub>d</sub> value was derived using Biacore T200 Evaluation software Version 1.0 (Cytiva) and steady state analysis of data at equilibrium.

# Supplemental Figure 1

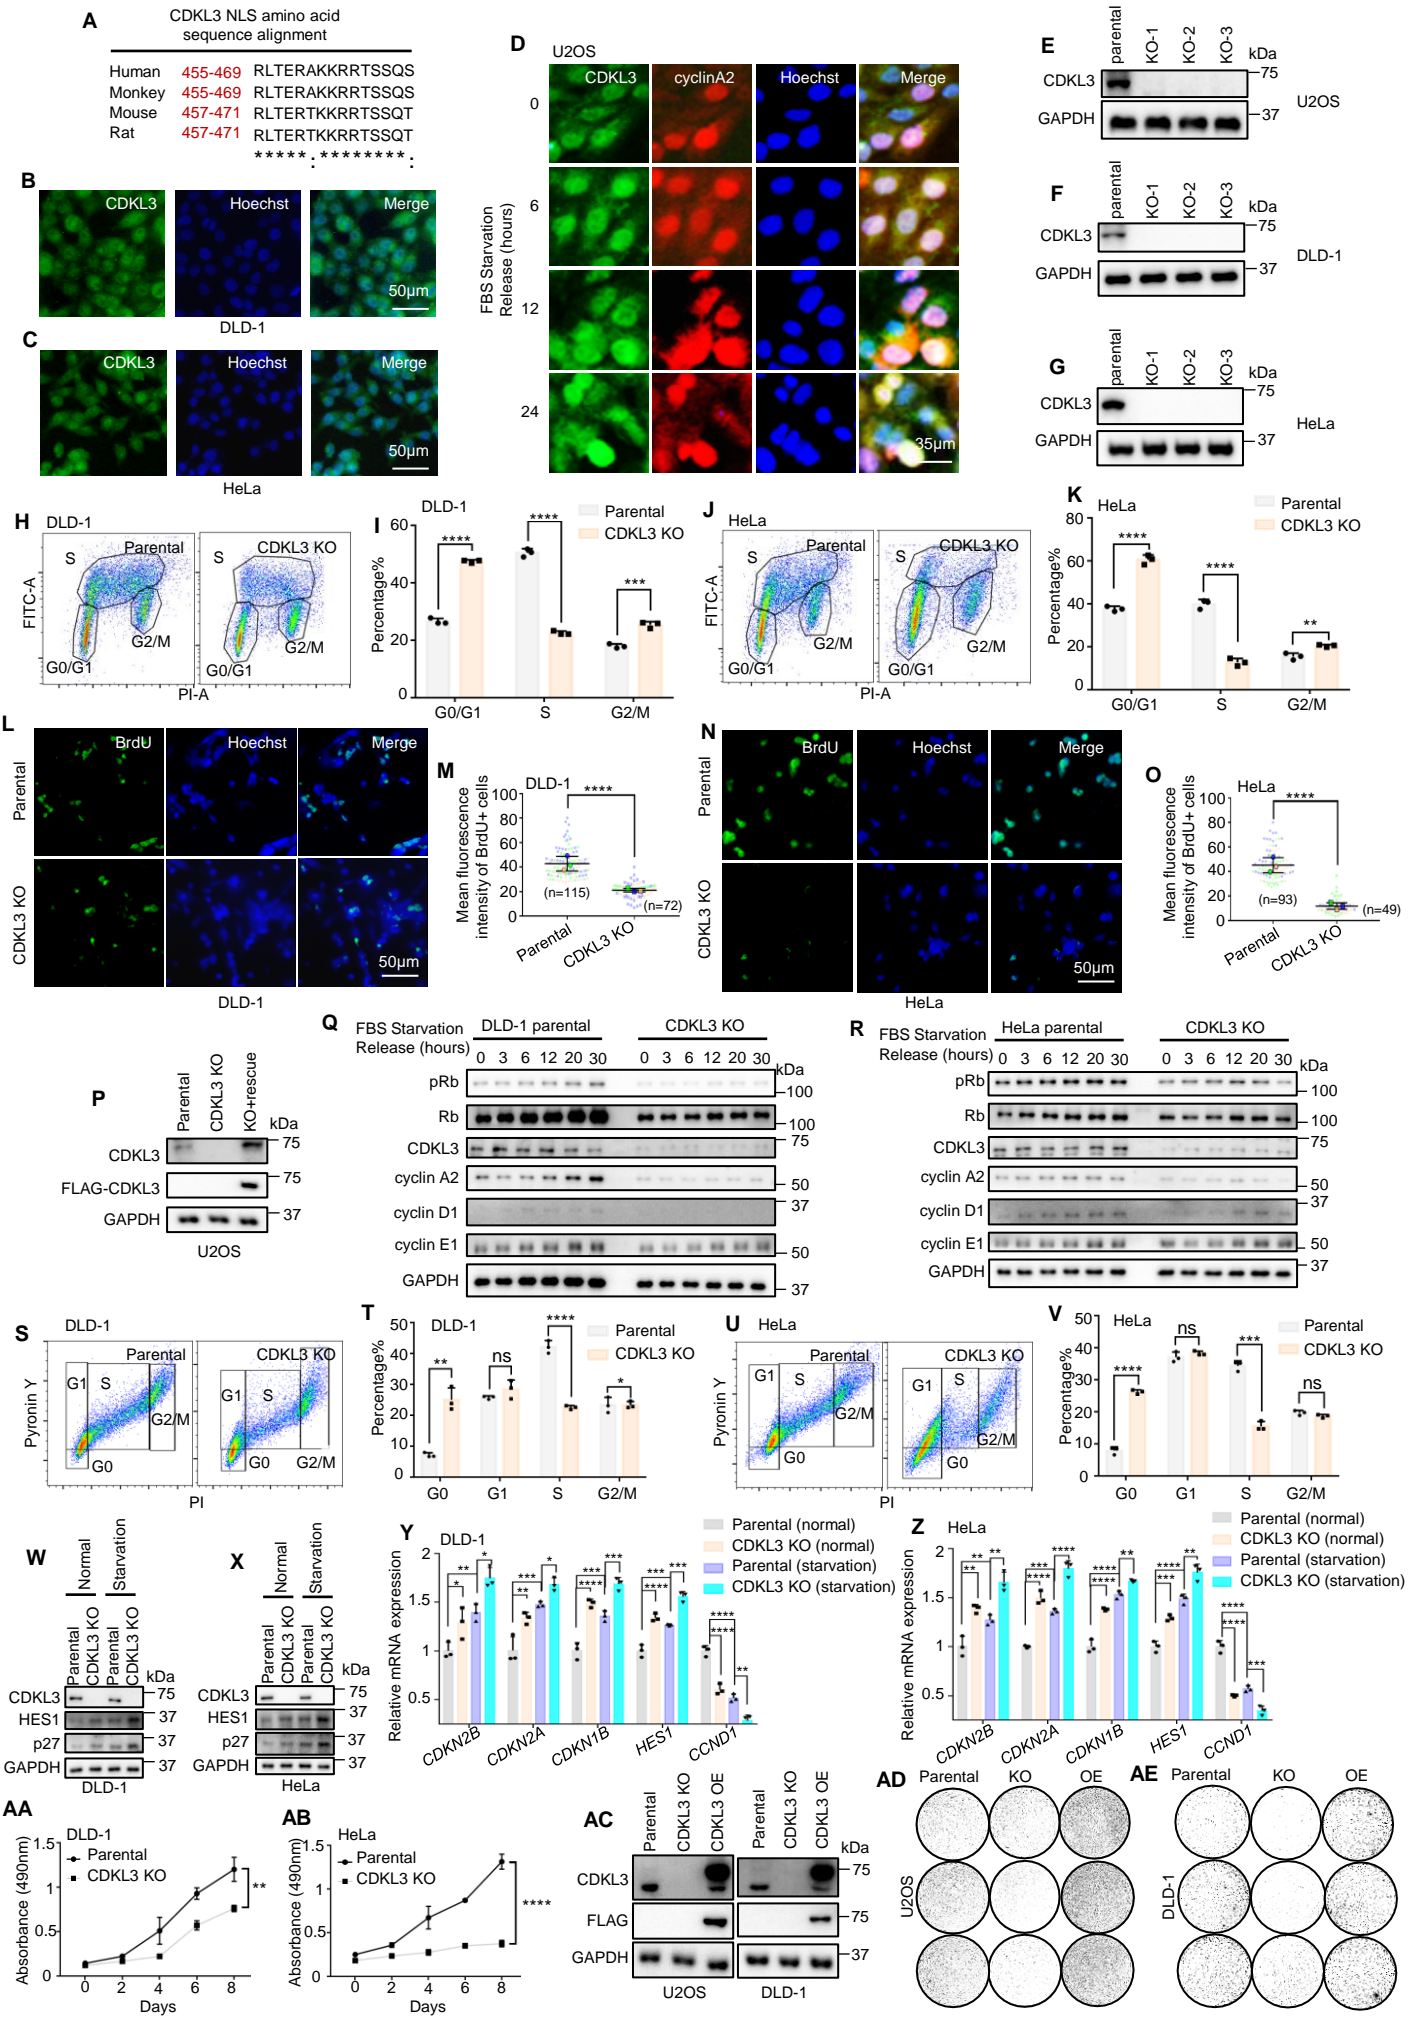

**Supplemental Figure 1. Supporting information showing CDKL3-loss abrogates cancer cell growth by impeding G0-to-G1 transition.**

(A) Sequence alignment showed the putative nucleus-localization sequence (NLS) in CDKL3 was conserved in mammalian (CDKL3 only has direct homolog within mammals). (B, C) Immunostaining showing the nuclear-localization of endogenous CDKL3 in DLD-1 (B) and HeLa cells (C). (D) Immunostaining showing the nuclear-localization of endogenous CDKL3 was independent of cell cycle phases in U2OS cells. Cyclin A2 was used as the marker for cell cycle progression. (E-G) Validation of CDKL3 knockout by multiple sgRNAs by immunoblotting assay in U2OS (E), DLD-1 (F) and HeLa (G). CDKL3 KO-1 in these cells were used and abbreviated as CDKL3 KO in sequel experiments. (H, I) Representative flow cytometry results (H) and statistical analysis (I) of DLD-1 cells with BrdU-FITC/PI dual staining. Error bar means  $\pm$  SD, n=3, by two-tailed Student's t-test. (J, K) Representative flow cytometry results (J) and statistical analysis (K) of HeLa cells with BrdU-FITC/PI dual staining. Error bar means  $\pm$  SD, n=3, by two-tailed Student's t-test. (L, M) Representative images of immunofluorescence of BrdU in DLD-1 (L) and superplot analysis of BrdU-positive cells and mean BrdU intensity per cell (M). Green: GFP; Blue: Hoechst. Error bar means  $\pm$  SD, triplicated, by two-tailed Student's t-test. n value in the panel represents the total number of cells. (N, O) Representative images of immunofluorescence of BrdU in HeLa (N) and superplot analysis of BrdU-positive cells and mean BrdU intensity per cell (O). Green: GFP; Blue: Hoechst. Error bar means  $\pm$  SD, triplicated, by two-tailed Student's t-test. n value in the panel represents the total number of cells. (P) Validation of CDKL3 KO and rescue by immunoblotting. (Q, R) Immunoblotting of multiple cell cycle related proteins after serum starvation and release in DLD-1 (Q) and HeLa cells (R). (S, T) Representative flow cytometry results (S) of DLD-1 cells with Pylonin Y/PI dual staining and statistical analysis (T). Error bar means  $\pm$  SD, n=3, by two-tailed Student's t-test. (U, V) Representative flow cytometry results (U) of HeLa cells with Pylonin Y/PI dual staining and statistical analysis (V). Error bar means  $\pm$  SD, n=3, by two-tailed Student's t-test. (W, X) Immunoblotting showing CDKL3 ablation increased the protein levels of G0 markers Hes1 and p27 in DLD-1 (W) and HeLa (X) cells. (Y, Z) RT-pPCR assay showing the transcription of G0 markers genes (*CDKN2B*, *CDKN2A*, *CDKN1B* and *HES1*) increased in the absence of CDKL3 in DLD-1 (Y) and HeLa (Z) cells. *CCND1* was used as the marker of G1 phase. Error bar means  $\pm$  SD, n=3, by one-way ANOVA. (AA, AB) MTT assay showing the growth of DLD-1 (AA) and HeLa cells (AB). Error bars mean  $\pm$  SD, n=3, by two-way ANOVA. (AC) Validation of CDKL3 KO and overexpression in U2OS and DLD-1 cells by immunoblotting. (AD, AE) The gross images of colony formation of U2OS (AD) and DLD-1 (AE) cells under three-dimensional culturing condition. The quantifications were shown in Figure 2H and 2I. All images in the same panel are under the same amplification scales. ns, not significant; \*, p<0.05; \*\*, p<0.01; \*\*\*, p<0.001; \*\*\*\*, p<0.0001.

# Supplemental Figure 2

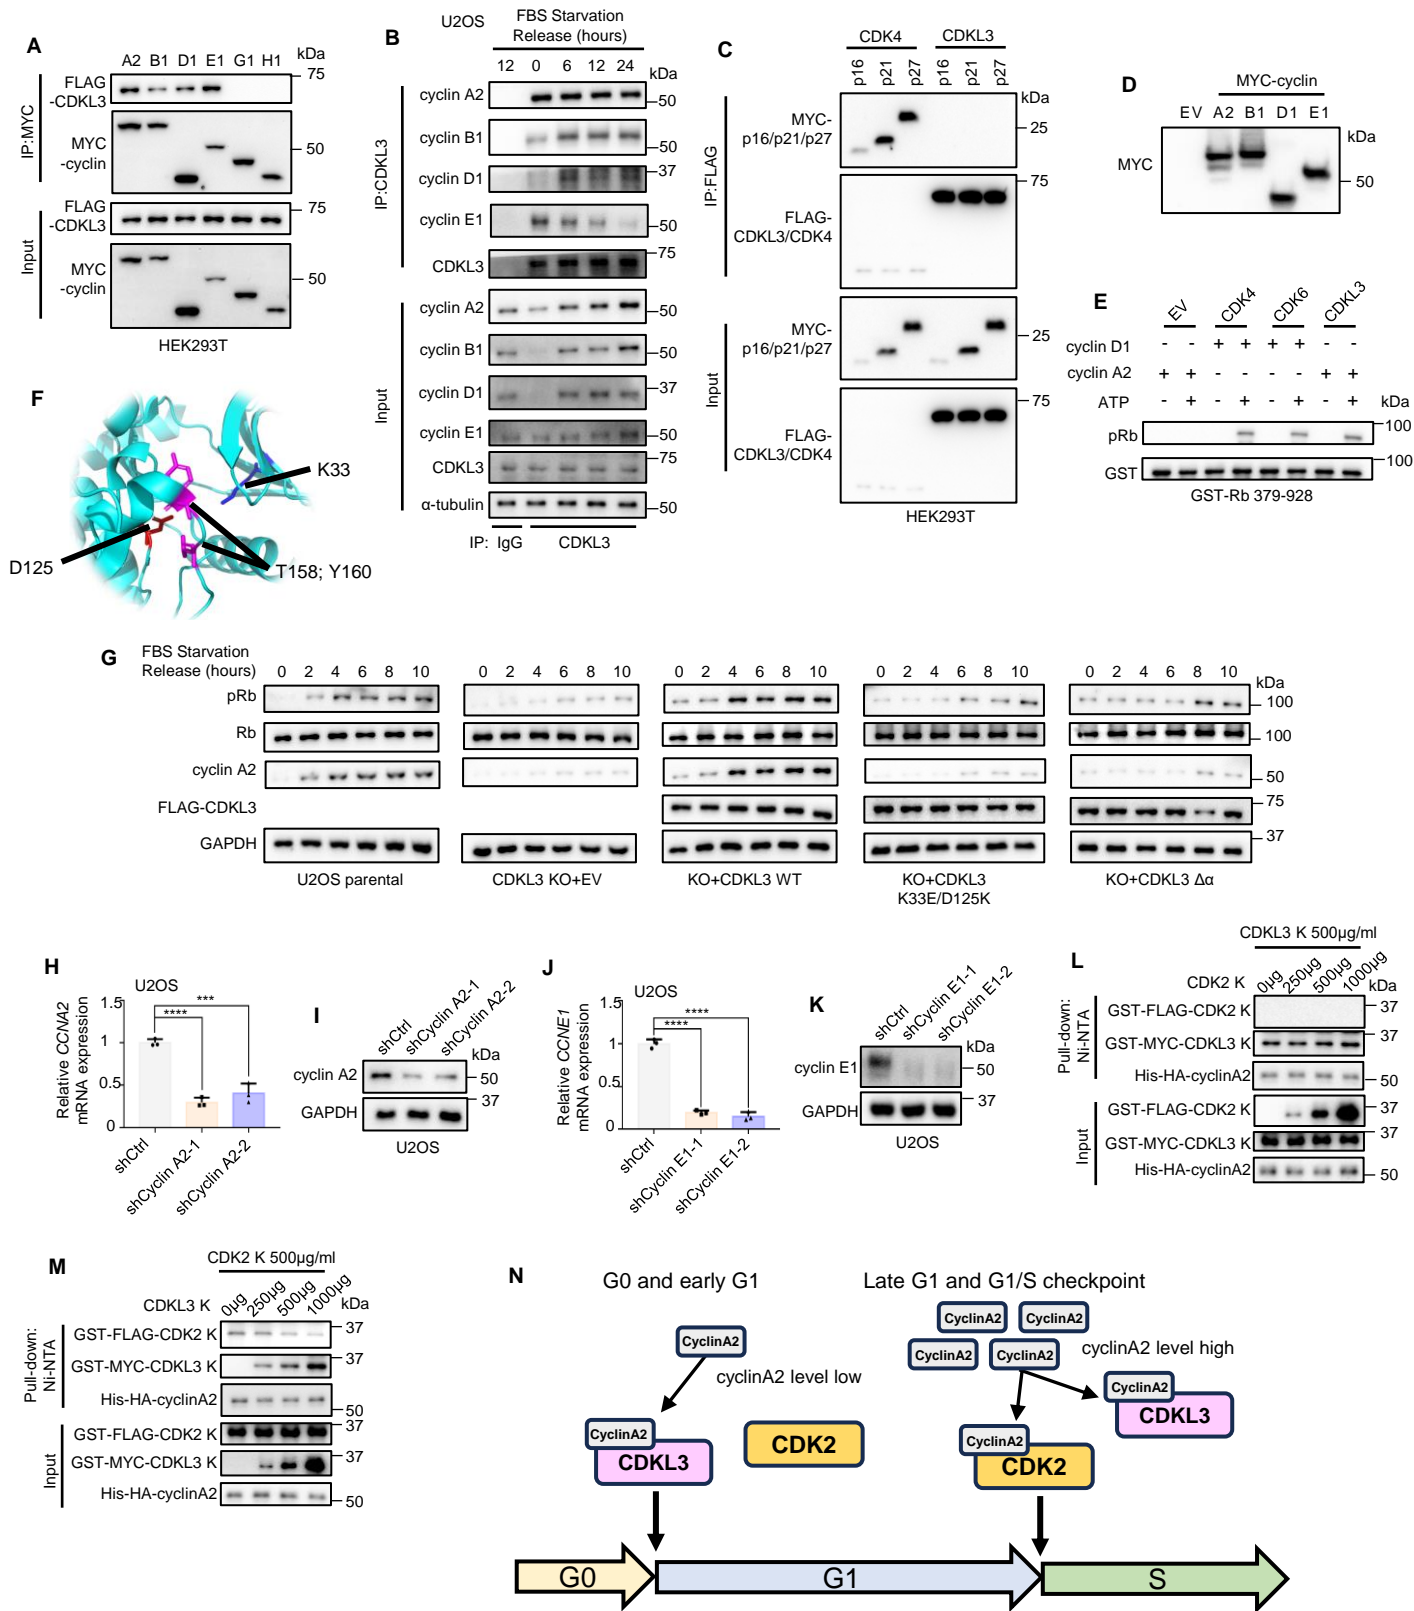

**Supplemental Figure 2. Supporting information showing CDKL3 phosphorylates Rb for cell cycle entry when coupling with cyclin A2.**

(A) Co-IP assay showing exogenous cyclin A2, B1, D1 and E1 binds to CDKL3. (B) Co-IP assay at different cell cycle phases showing endogenous CDKL3-cyclin A2 binding was largely unaltered. Starting from G0, CDKL3-cyclin B1/D1 binding gradually increased as CDKL3-cyclin E1 binding decreased. (C) Co-IP assay showing exogenous CDKL3 does not bind to p16, p21 or p27. (D) Validation of purified cyclins by immunoblotting. (E) In vitro kinase assay showing CDKL3 phosphorylates Rb (379-928) to the similar extent of CDK4/6. (F) Schematic diagram of K33 (ATP binding site), D125 (conserved substrate-binding Asp), T158/Y160 (TxY motif) sites on CDKL3 kinase domain. PDBID: 3ZDU. (G) Immunoblotting assay showing CDKL3 K33E/D125K and  $\Delta\alpha$  mutants lost the capacity of promoting the initial Rb phosphorylation after serum starvation and release in U2OS cells. (H, I) Validation of cyclin A2 knockdown by RT-qPCR (H) and immunoblotting (I) in U2OS cells. shCyclin A2-1 was abbreviated as shCyclin A2 in the sequel experiments. Error bar means  $\pm$  SD, n=3, by one-way ANOVA. (J, K) Validation of cyclin E1 knockdown by RT-qPCR (J) and immunoblotting (K) in U2OS cells. shCyclin E1-1 was abbreviated as shCyclin E1 in the sequel experiments. Error bar means  $\pm$  SD, n=3, by one-way ANOVA. (L, M) In vitro competition assay showing the pre-formed CDKL3 kinase domain-cyclin A2 complex cannot be effectively disrupted by the addition of CDK2 kinase domain (L), whereas titration of CDKL3 kinase domain can disrupt the binding between CDK2 kinase domain and cyclin A2 (M). This demonstrates that cyclin A2 binds to CDKL3 with higher affinity than CDK2. K: Kinase domain. (N) Working model of CDKL3 and CDK2 associating with cyclin A2. Cyclin A2 has low abundance during cell quiescence, so that cyclin A2 preferably binds to CDKL3 for G0 exit. In late G1 phase, cyclin A2 becomes abundant, which enables the activation of CDK2, potentially leading to the G1-to-S transition. \*\*\*, p<0.001; \*\*\*\*, p<0.0001.

# Supplemental Figure 3

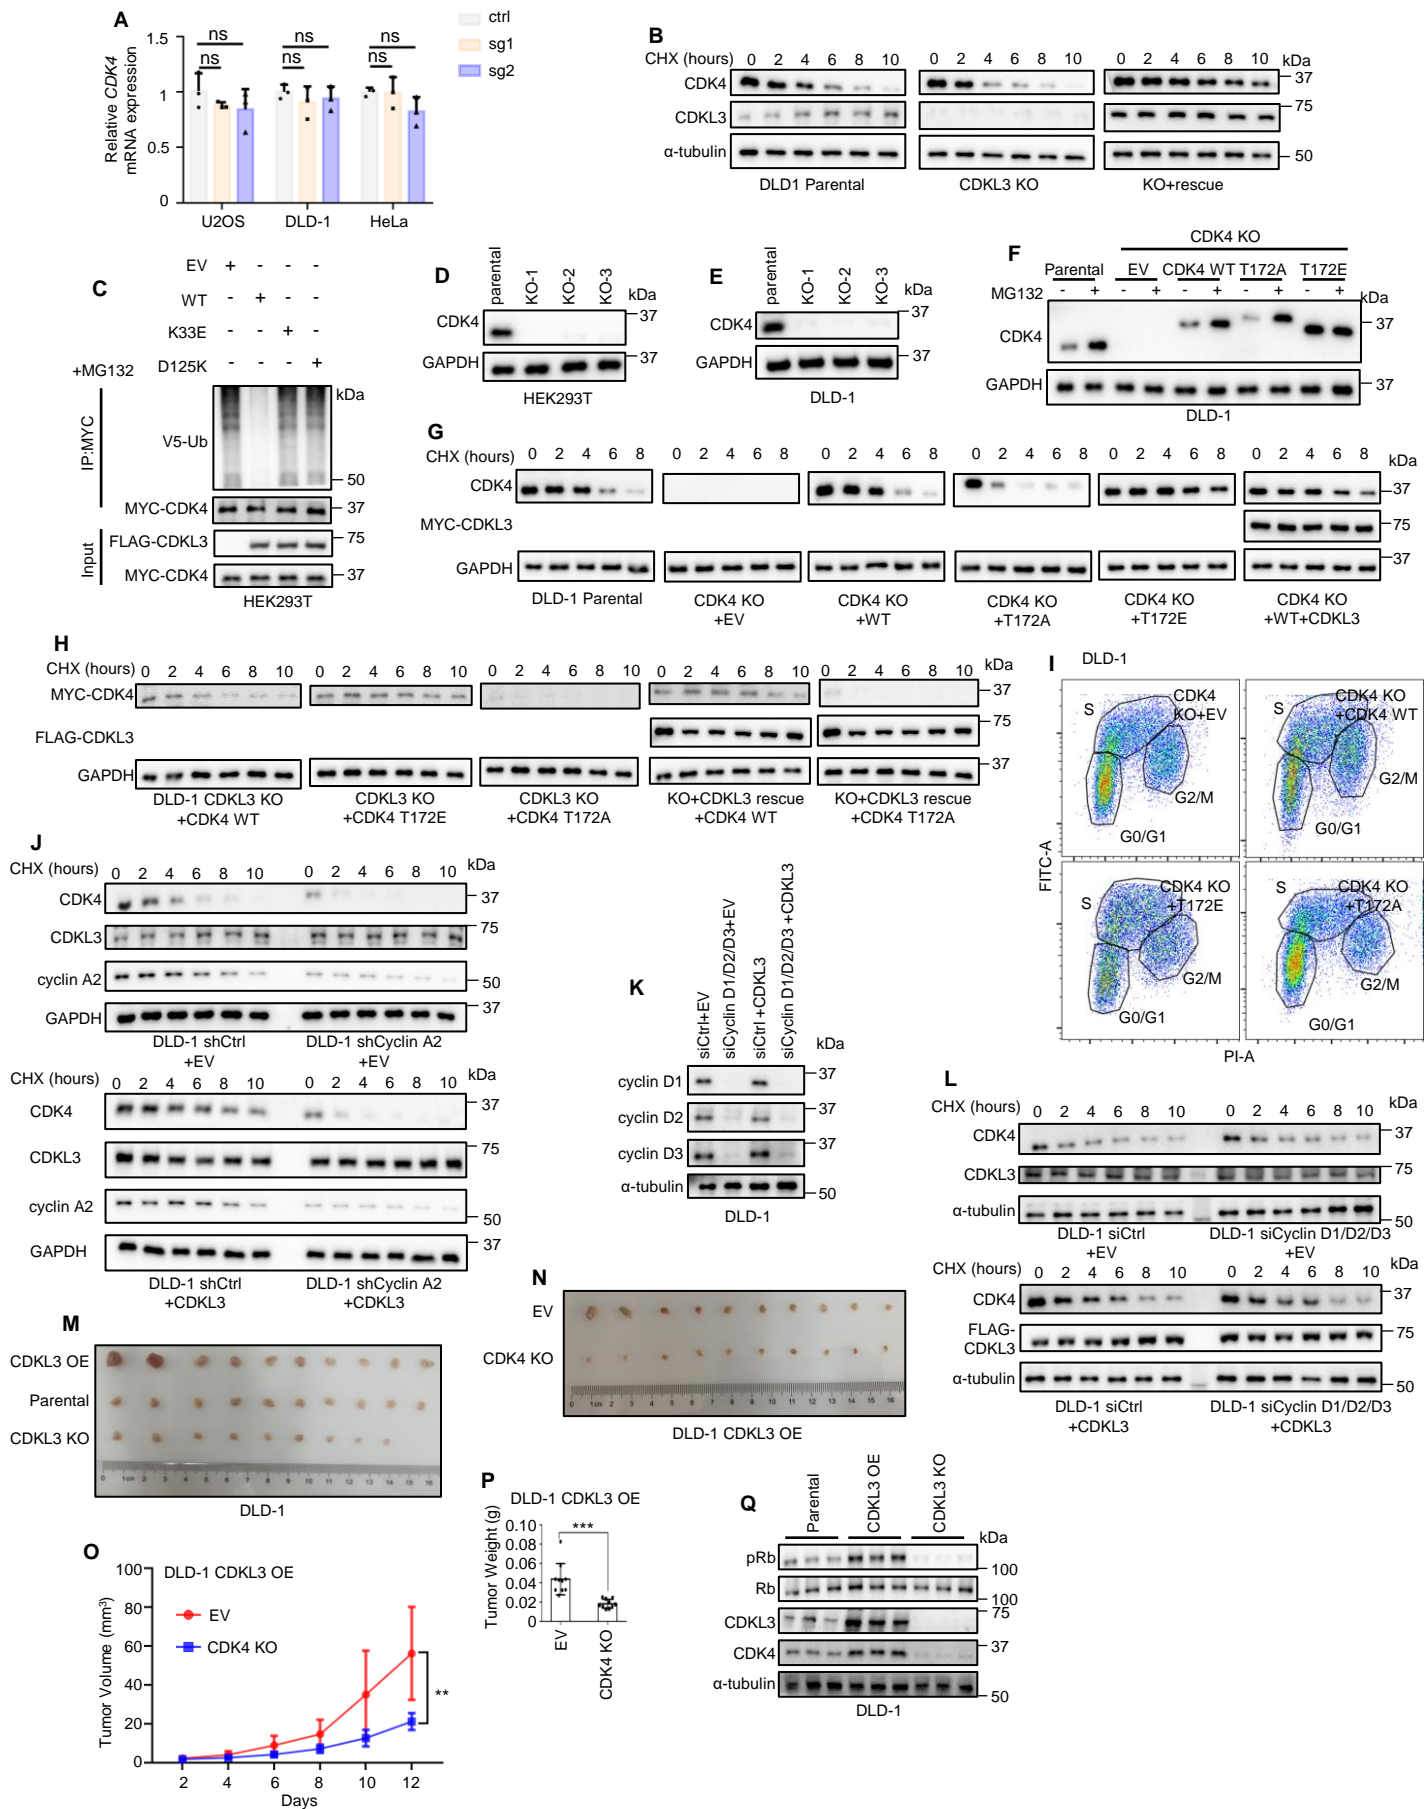

**Supplemental Figure 3. Supporting information showing CDKL3 phosphorylates CDK4 on T172 to promote CDK4 stability via K48-linked poly-ubiquitination prevention.**

(A) RT-qPCR showing CDKL3 knockout does not alter the transcription level of CDK4 in U2OS, DLD-1 or HeLa cells. Error bar means  $\pm$  SD, n=3, by one-way ANOVA. (B) The CHX-blocking assay showing CDKL3-loss reduced CDK4 protein stability. The quantification was shown in Figure 4B. (C) Ubiquitination assay of exogenous CDK4 showing the presence of WT CDKL3 reduced CDK4 ubiquitination instead of K33E/D125K mutant. MG132 was pretreated to maintain the same protein level. (D, E) Validation of CDK4 knockout by multiple sgRNAs by immunoblotting in HEK293T (D) and DLD-1 (E). CDK4 KO-1 in these cells were used and abbreviated as CDK4 KO in sequel experiments. (F) Immunoblotting assay showing MG132 treatment stabilizes CDK4 T172A in CDK4 KO and rescued DLD-1 cells. CDK4 T172E was insensitive to MG132 treatment. The rescue of CDK4 WT, T172A and T172E was approximately at the same level with the endogenous CDK4 in DLD-1 cells. (G, H) The CHX-blocking assay showing the protein stability of CDK4 WT and mutants under different circumstances. The quantifications were shown in Figure 5C and 5D, respectively. (I) Representative flow cytometry results of DLD-1 cells with BrdU-FITC/PI dual staining. The quantification was shown in Figure 5F. (J) The CHX-blocking assay showing the stabilization of CDK4 by CDKL3 was dependent on cyclin A2. The quantification was shown in Figure 5G. (K) Immunoblotting validation of cyclin D1/D2/D3 triple knockdown by siRNA. (L) The CHX-blocking assay showing the stabilization of CDK4 by CDKL3 was independent of cyclin D. The quantification was shown in Figure 5H. (M) Images of the tumors formed by subcutaneously transplanted DLD-1 cells after abscission. (N) Images of the tumors formed by subcutaneously transplanted CDKL3 OE DLD-1 cells after abscission. (O, P) Quantitative analyses of the tumor volume (O) and weight (P) of tumors formed by the subcutaneously transplanted CDKL3 OE DLD-1 cells. (O): Error bars mean  $\pm$  SD, n=10, two-way ANOVA. (P): Error bar means  $\pm$  SD, n=10, two-tailed Student's t-test. (Q) Immunoblotting of the key cell cycle related proteins (and phosphorylation) in the transplanted DLD-1 tumor tissues (n=3). Each lane represents an individual tissue. ns, not significant; \*\*, p<0.01; \*\*\*, p<0.001.

# Supplemental Figure 4

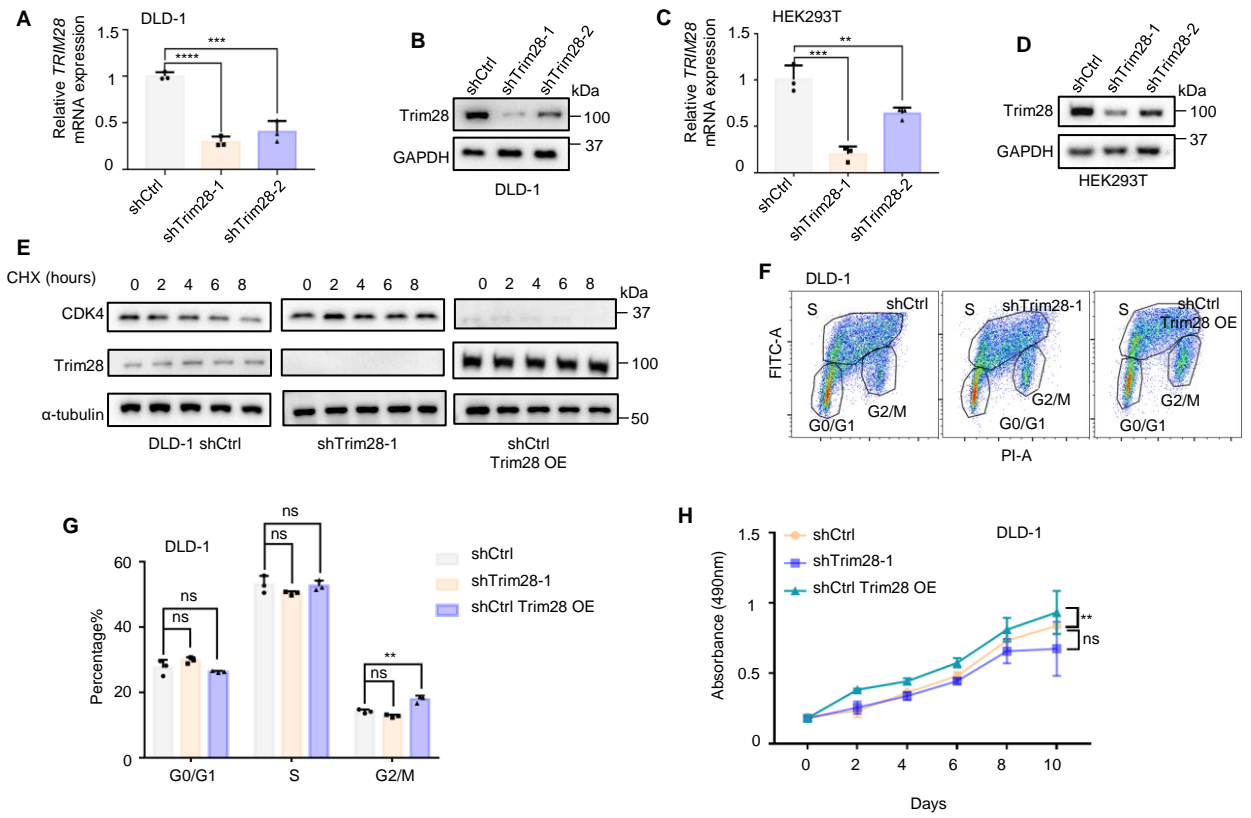



**Supplemental Figure 4. Supporting information showing Trim28 ubiquitinates CDK4 for protein degradation in the absence of T172 phosphorylation.**

(A, B) Validation of Trim28 knockdown by RT-qPCR (A) and immunoblotting (B) in DLD-1 cells. Error bar means  $\pm$  SD, n=3, by one-way ANOVA. shTrim28-1 was used and abbreviated as shTrim28 in sequel experiments. (C, D) Validation of Trim28 knockdown by RT-qPCR (C) and immunoblotting (D) in HEK293T cells. Error bar means  $\pm$  SD, n=3, by one-way ANOVA. shTrim28-1 was used and abbreviated as shTrim28 in sequel experiments. (E) CHX-blocking assay of endogenous CDK4 under Trim28 overexpression or knockdown conditions in DLD-1. The quantification was shown in Figure 6G. (F) Representative flow cytometry results of DLD-1 cells with BrdU-FITC/PI dual staining. (G) Statistical analysis of F. Error bar means  $\pm$  SD, n=3, by one-way ANOVA. (H) MTT assay showing the growth of DLD-1 cells under Trim28 overexpression or depletion conditions. Error bars mean  $\pm$  SD, n=3, by two-way ANOVA. ns, not significant; \*\*, p<0.01; \*\*\*, p<0.001; \*\*\*\*, p<0.0001.

# Supplemental Figure 5

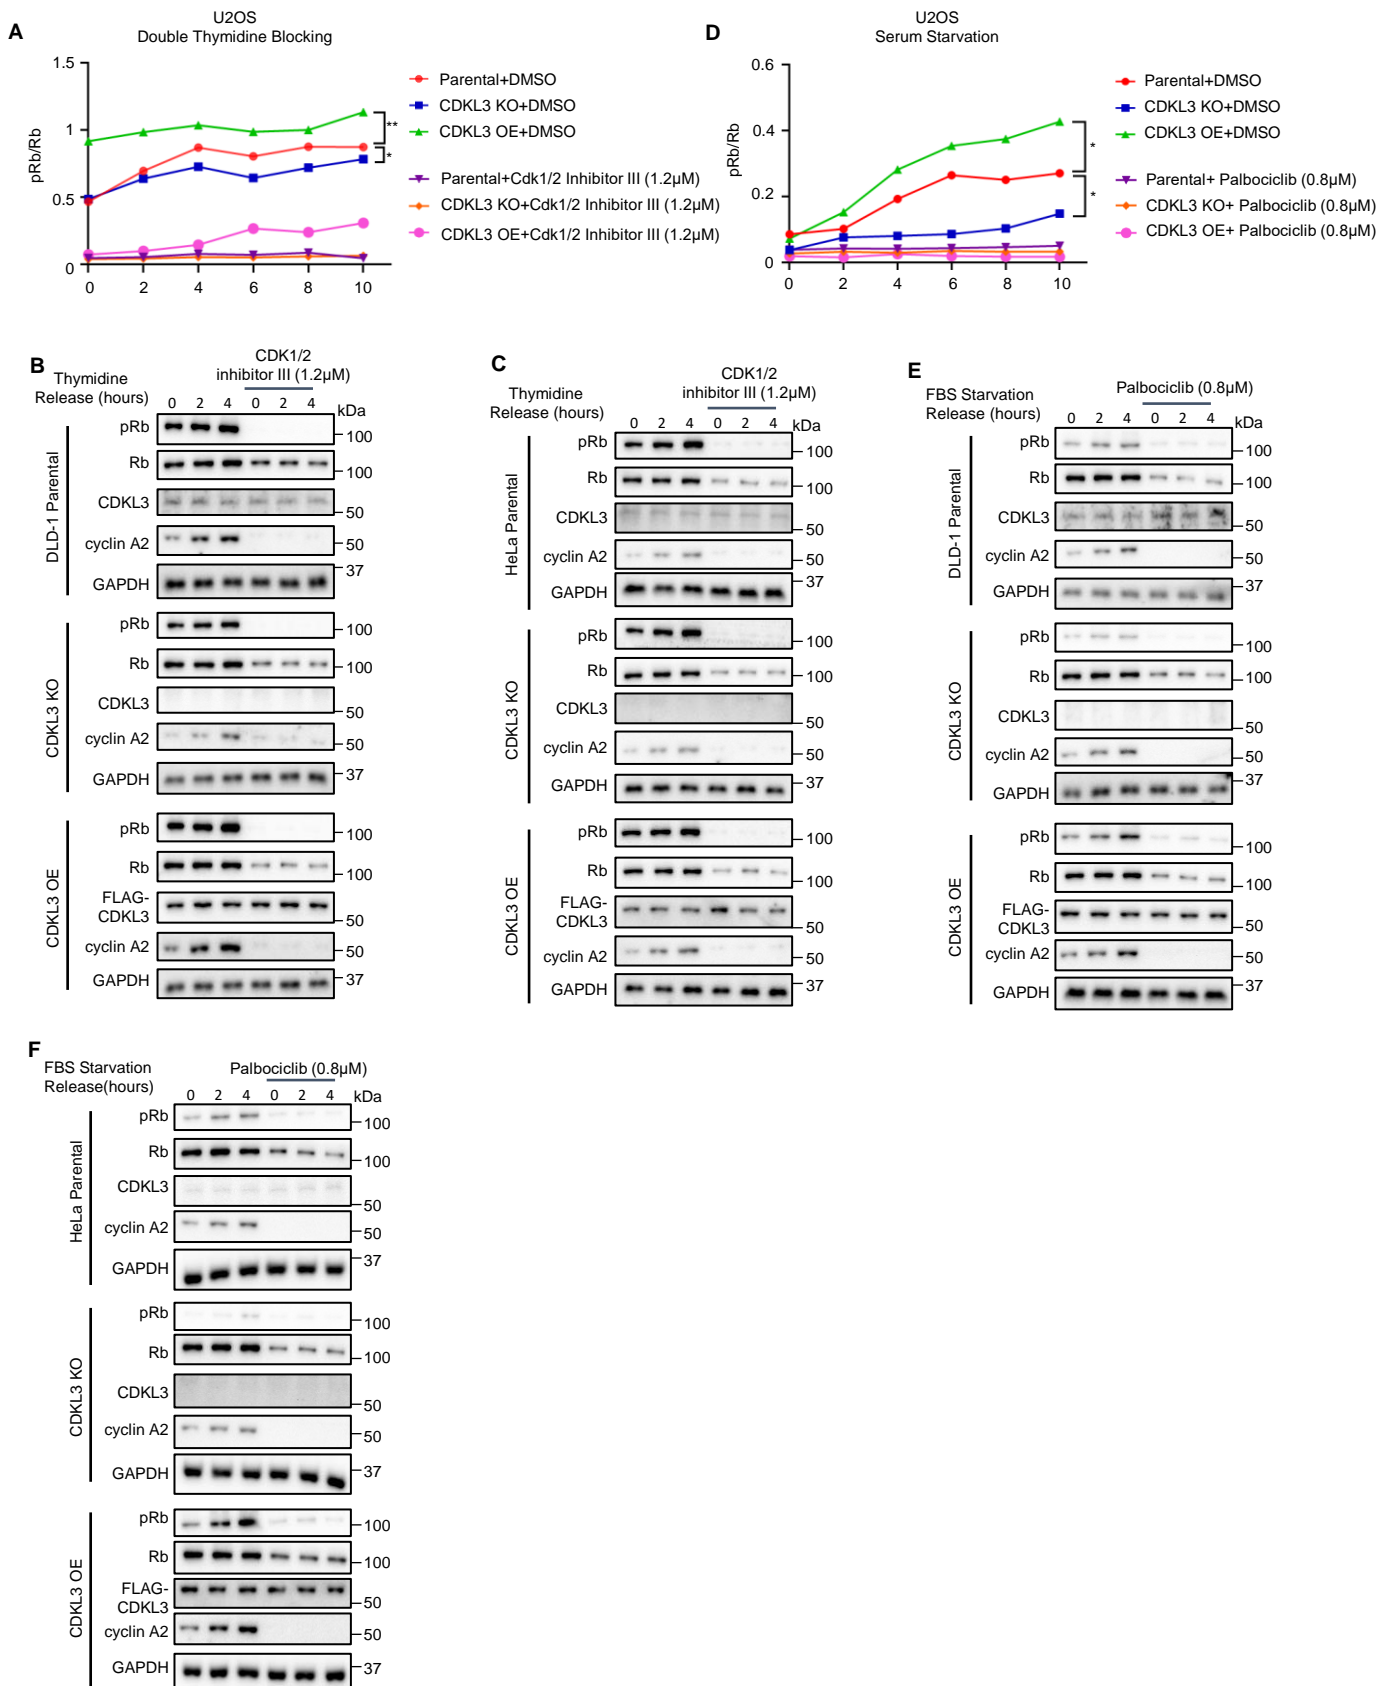

**Supplemental Figure 5. Supporting information showing CDK inhibitors do not affect CDKL3 kinase activity.**

(A) Statistical analysis of Rb phosphorylation under CDKL3 knockout/overexpression and CDK1/2 inhibitors conditions in U2OS cells with double thymidine blocking treatment in Figure 7C. By one-way ANOVA. (B) Immunoblotting of multiple cell cycle related proteins with double thymidine blocking and release and CDK1/2 inhibitor III treatment (1.2 $\mu$ M) under parental, CDKL3 knockout or overexpression conditions in DLD-1 cells. (C) Immunoblotting of multiple cell cycle related proteins with double thymidine blocking and release and CDK1/2 inhibitor III treatment (1.2 $\mu$ M) under parental, CDKL3 knockout or overexpression conditions in HeLa cells. (D) Statistical analysis of Rb phosphorylation under CDKL3 knockout/overexpression and Palbociclib conditions in U2OS cells with serum starvation treatment in Figure 7E. By one-way ANOVA. (E) Immunoblotting of multiple cell cycle related proteins after serum starvation and release and Palbociclib treatment (0.8 $\mu$ M) under parental, CDKL3 knockout or overexpression conditions in DLD-1 cells. (F) Immunoblotting of multiple cell cycle related proteins after serum starvation and release and Palbociclib treatment (0.8 $\mu$ M) under parental, CDKL3 knockout or overexpression conditions in HeLa cells. \*,  $p < 0.05$ ; \*\*,  $p < 0.01$ .

# Supplemental Figure 6

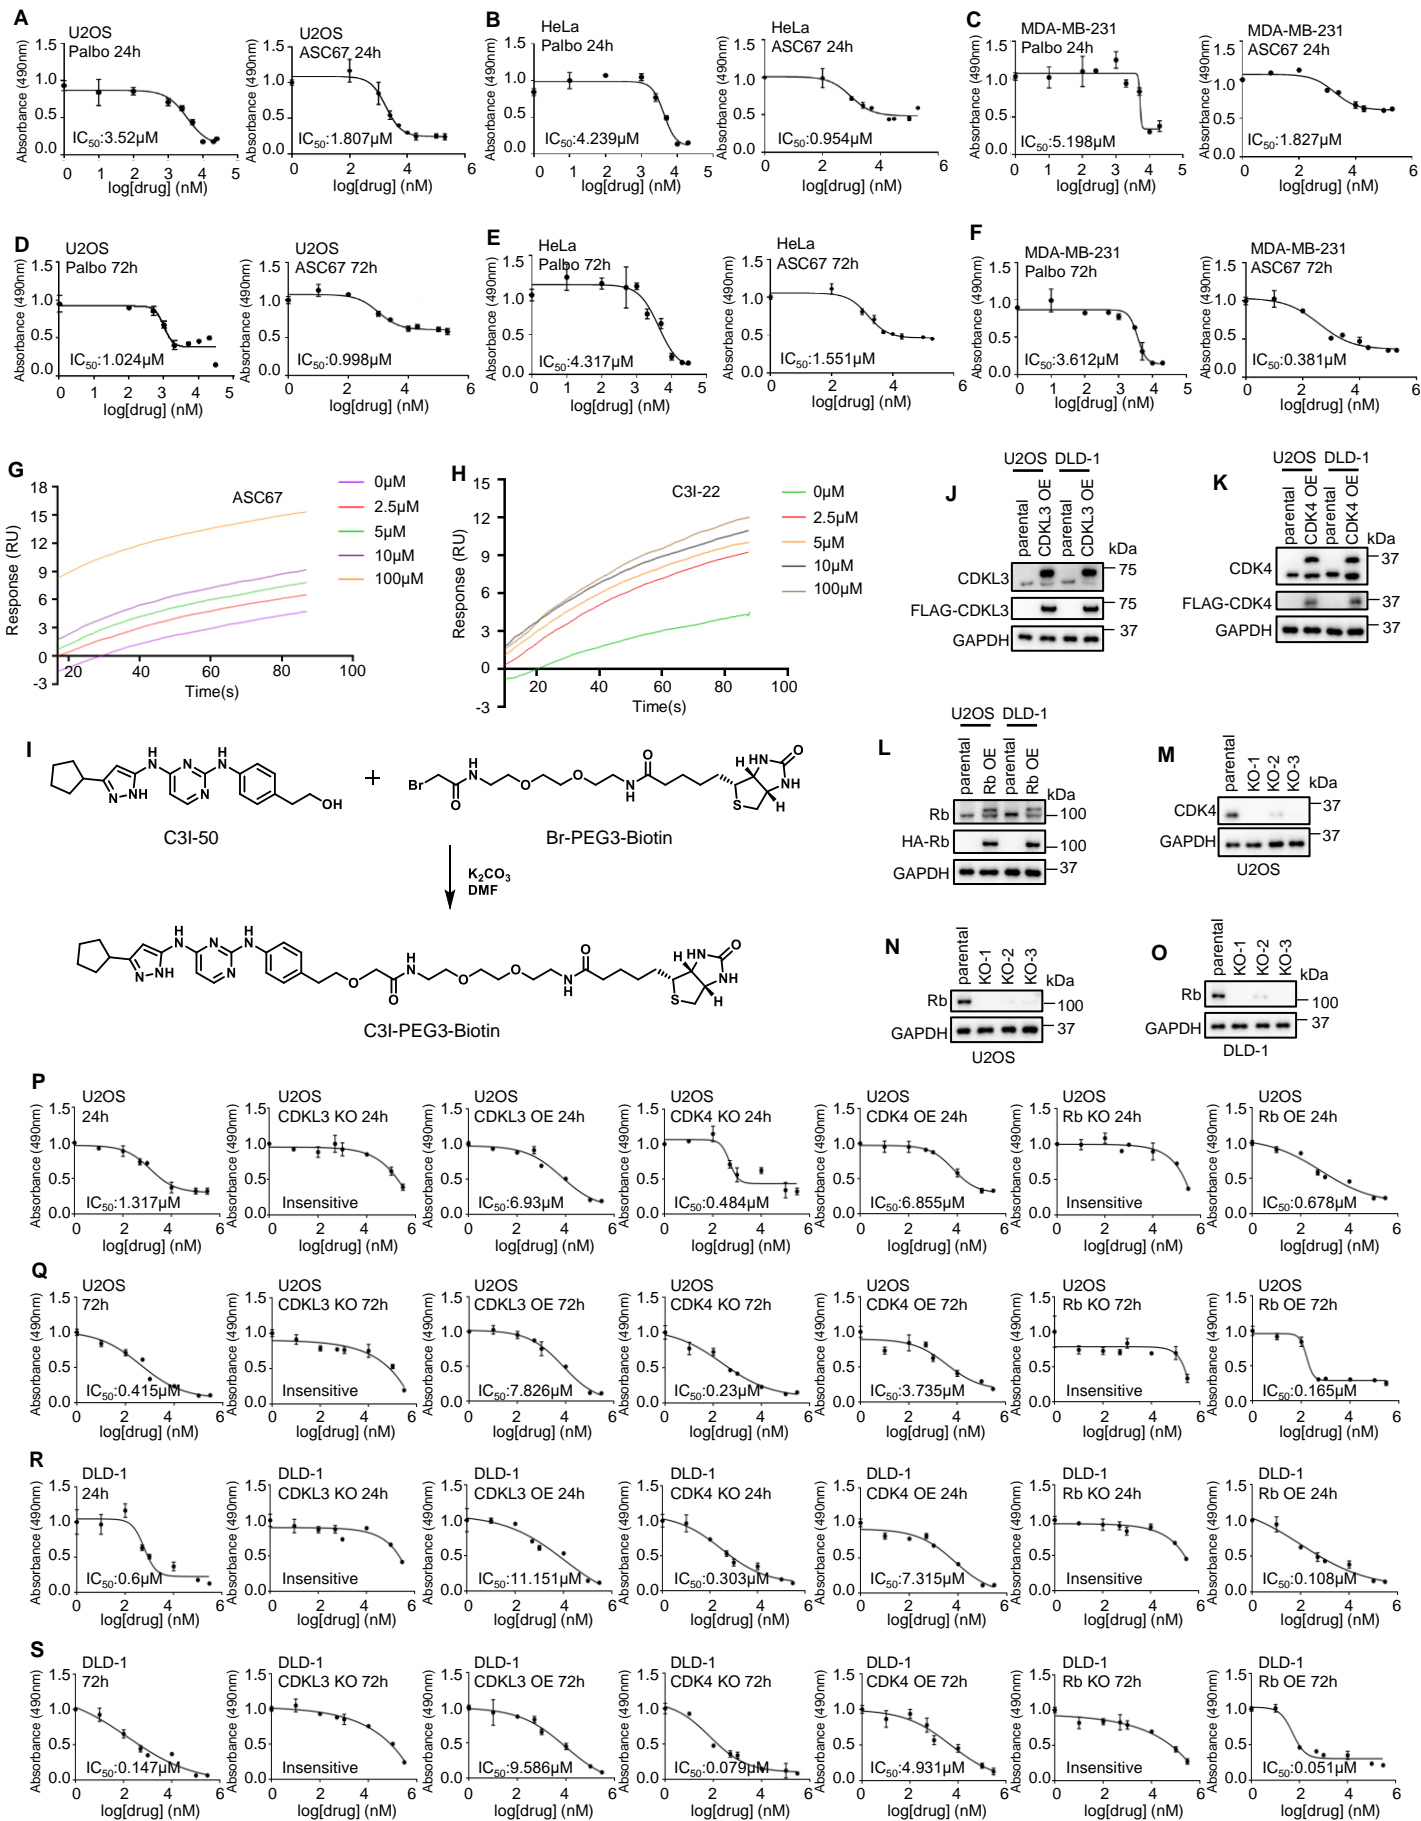

**Supplemental Figure 6. Supporting information of design and characterization of CDKL3 inhibitor.**

(**A-F**) Tumor-suppressing effects of Palbociclib and ASC67 under various conditions. A, U2OS, 24h; B, HeLa, 24h; C, MDA-MB-231, 24h; D, U2OS, 72h; E, HeLa, 72h; F, MDA-MB-231, 72h. (**G, H**) SPR sensorgrams of ASC67 (**G**) and C3I-22 (**H**) binding to CDKL3. (**I**) Synthesis route of the orthogonal PEG- and biotin-linked ASC67 derivative (C3I-PEG3-Biotin). (**J-L**) Immunoblotting validation of the overexpressed protein levels of CDKL3 (**J**), CDK4 (**K**) and Rb (**L**) in U2OS and DLD-1 cells. (**M-O**) Immunoblotting validation of CDK4 knockout in U2OS (**M**), Rb knockout in U2OS (**N**) and DLD-1 (**O**) by multiple sgRNAs. CDK4 or Rb KO-1 in these cells were used and abbreviated as CDK4 or Rb KO in sequel experiments, respectively. CDKL3 KO validation was shown in Supplemental Figure 1, E and F, for U2OS and DLD-1, respectively. CDK4 KO validation in DLD-1 was shown in Supplemental Figure 3E. (**P-S**) IC<sub>50</sub> curves of C3I-22 in parental, CDKL3/CDK4/Rb overexpressed, CDKL3/CDK4/Rb KO cells, respectively. **P**: 24h treatment in U2OS; **Q**: 72h treatment in U2OS; **R**: 24h treatment in DLD-1; **S**: 72h treatment in DLD-1. These data are summarized in Table 1. All IC<sub>50</sub> analysis was triplicated.

# Supplemental Figure 7

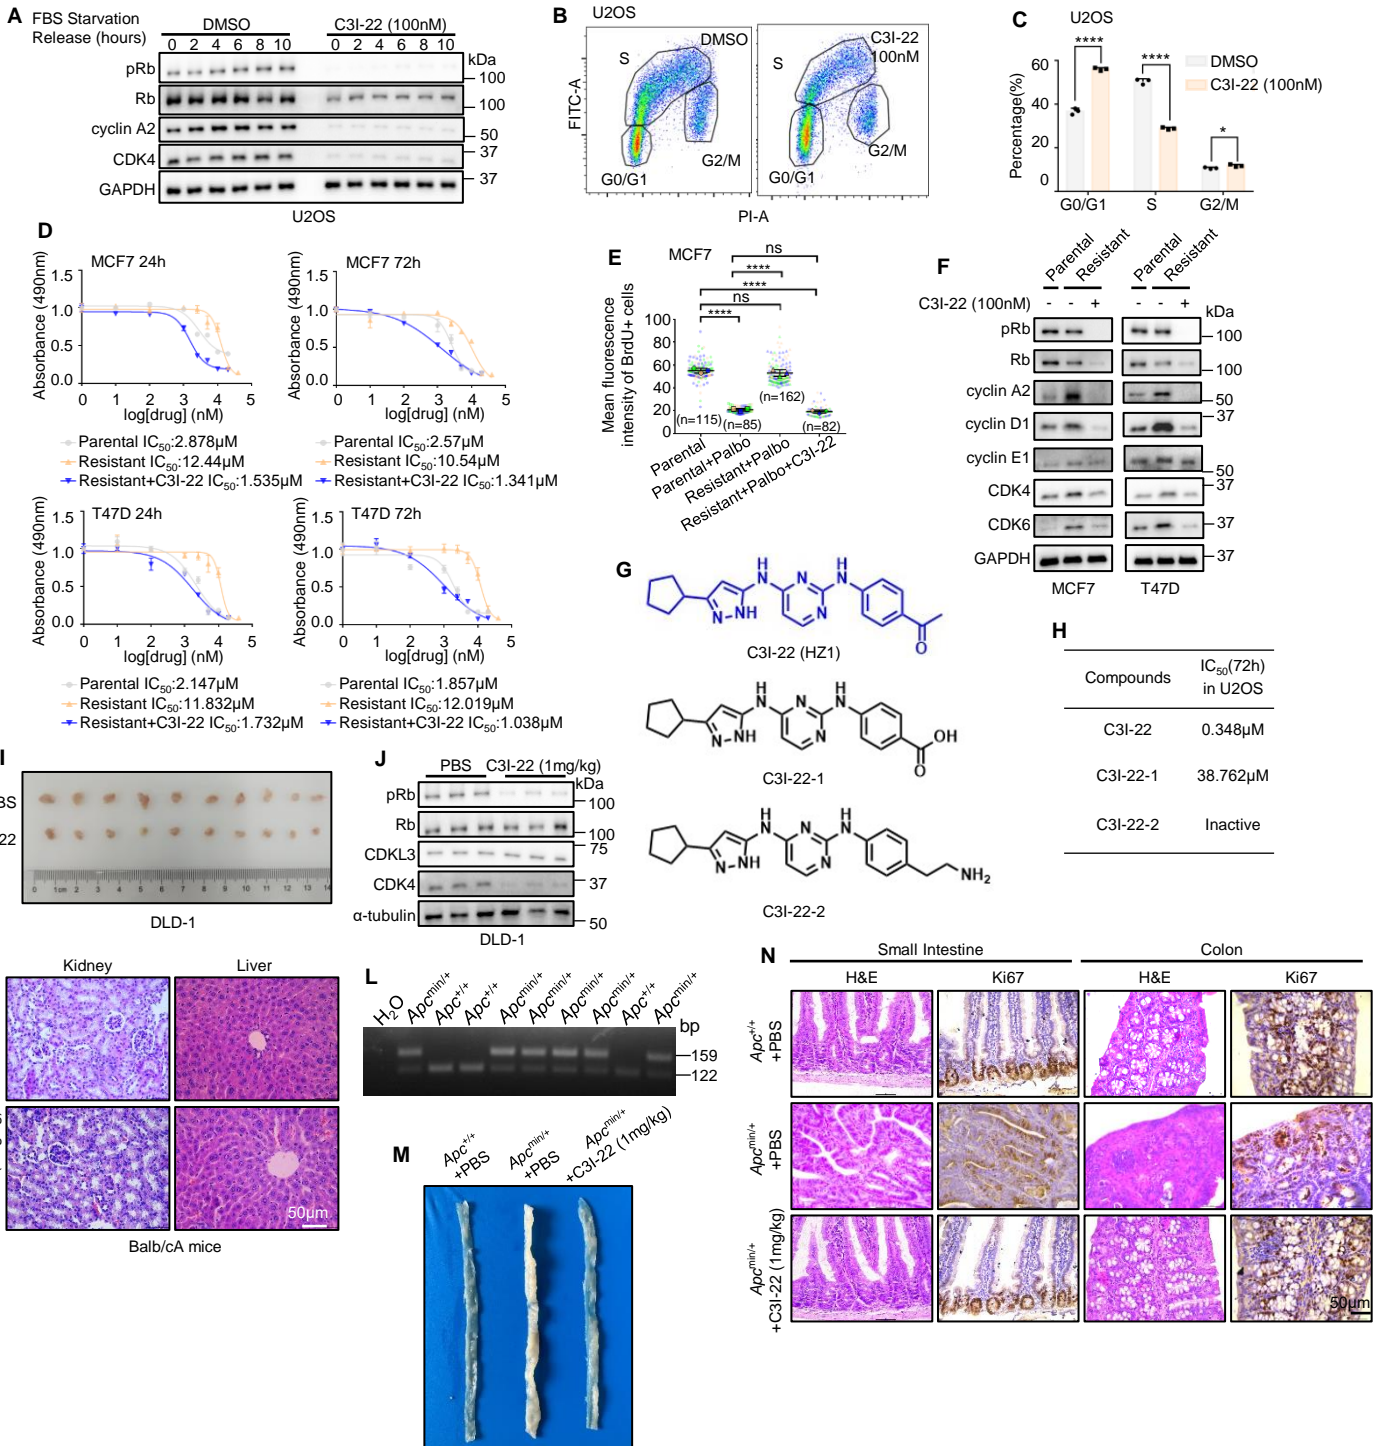

**Supplemental Figure 7. Supporting assays showing C3I-22 (HZ1) antagonizes cancer growth via cell cycle arrest in multiple models.**

(A) Immunoblotting of multiple cell cycle related proteins after serum starvation and release treat with C3I-22 (100nM) in U2OS cells. (B) Representative flow cytometry results of C3I-22 treatment (100nM) in U2OS cells with BrdU-FITC/PI dual staining. (C) Statistical analysis of B. Error bar means  $\pm$  SD, n=3, by two-tailed Student's t-test. (D) IC<sub>50</sub> curves of Palbociclib in parental/resistant MCF7 and T47D cells in Table 2. C3I-22 was treated at 100nM. (E) Superblot analysis of the number of BrdU-positive cells and mean BrdU intensity per cell in parental/resistant MCF7 cells under different conditions. Palbociclib: 800nM; C3I-22: 100nM. Error bar means  $\pm$  SD, triplicated, by one-way ANOVA. n value in the panel represents the total number of cells. (F) Western blotting showing treatment of C3I-22 effectively reduced the endogenous pRb, cyclin A2, cyclin D1 and CDK4/6 levels. (G) Chemical structures of C3I-22, C3I-22-1 and C3I-22-2. (H) List of IC<sub>50</sub> value of C3I-22-derived compounds in U2OS at 72h. (I) Images of the tumors formed by subcutaneously transplanted DLD-1 cells treat with CDKL3 inhibitor C3I-22 after abscission. (J) Immunoblotting of the key cell cycle related proteins (and phosphorylation) in the transplanted DLD-1 tumor tissues in I. Each lane represents an individual tumor tissue. (K) Representative HE staining images of kidney and liver of the C3I-22 treated nude mice. (L) Representative genotyping of *Apc*<sup>+/+</sup>, *Apc*<sup>min/+</sup> and *Apc*<sup>min/min</sup> mice. (M) Representative intestine images of *Apc*<sup>min/+</sup> mice treat with PBS or C3I-22. (N) Representative HE and IHC staining images of small intestine and colon tumors treated with PBS or C3I-22 in *Apc*<sup>min/+</sup> mice. All images in the same panel are under the same amplification scales. All IC<sub>50</sub> analysis was triplicated. ns, not significant; \*, p<0.05; \*\*\*\*, p<0.0001.

# Supplemental Figure 8

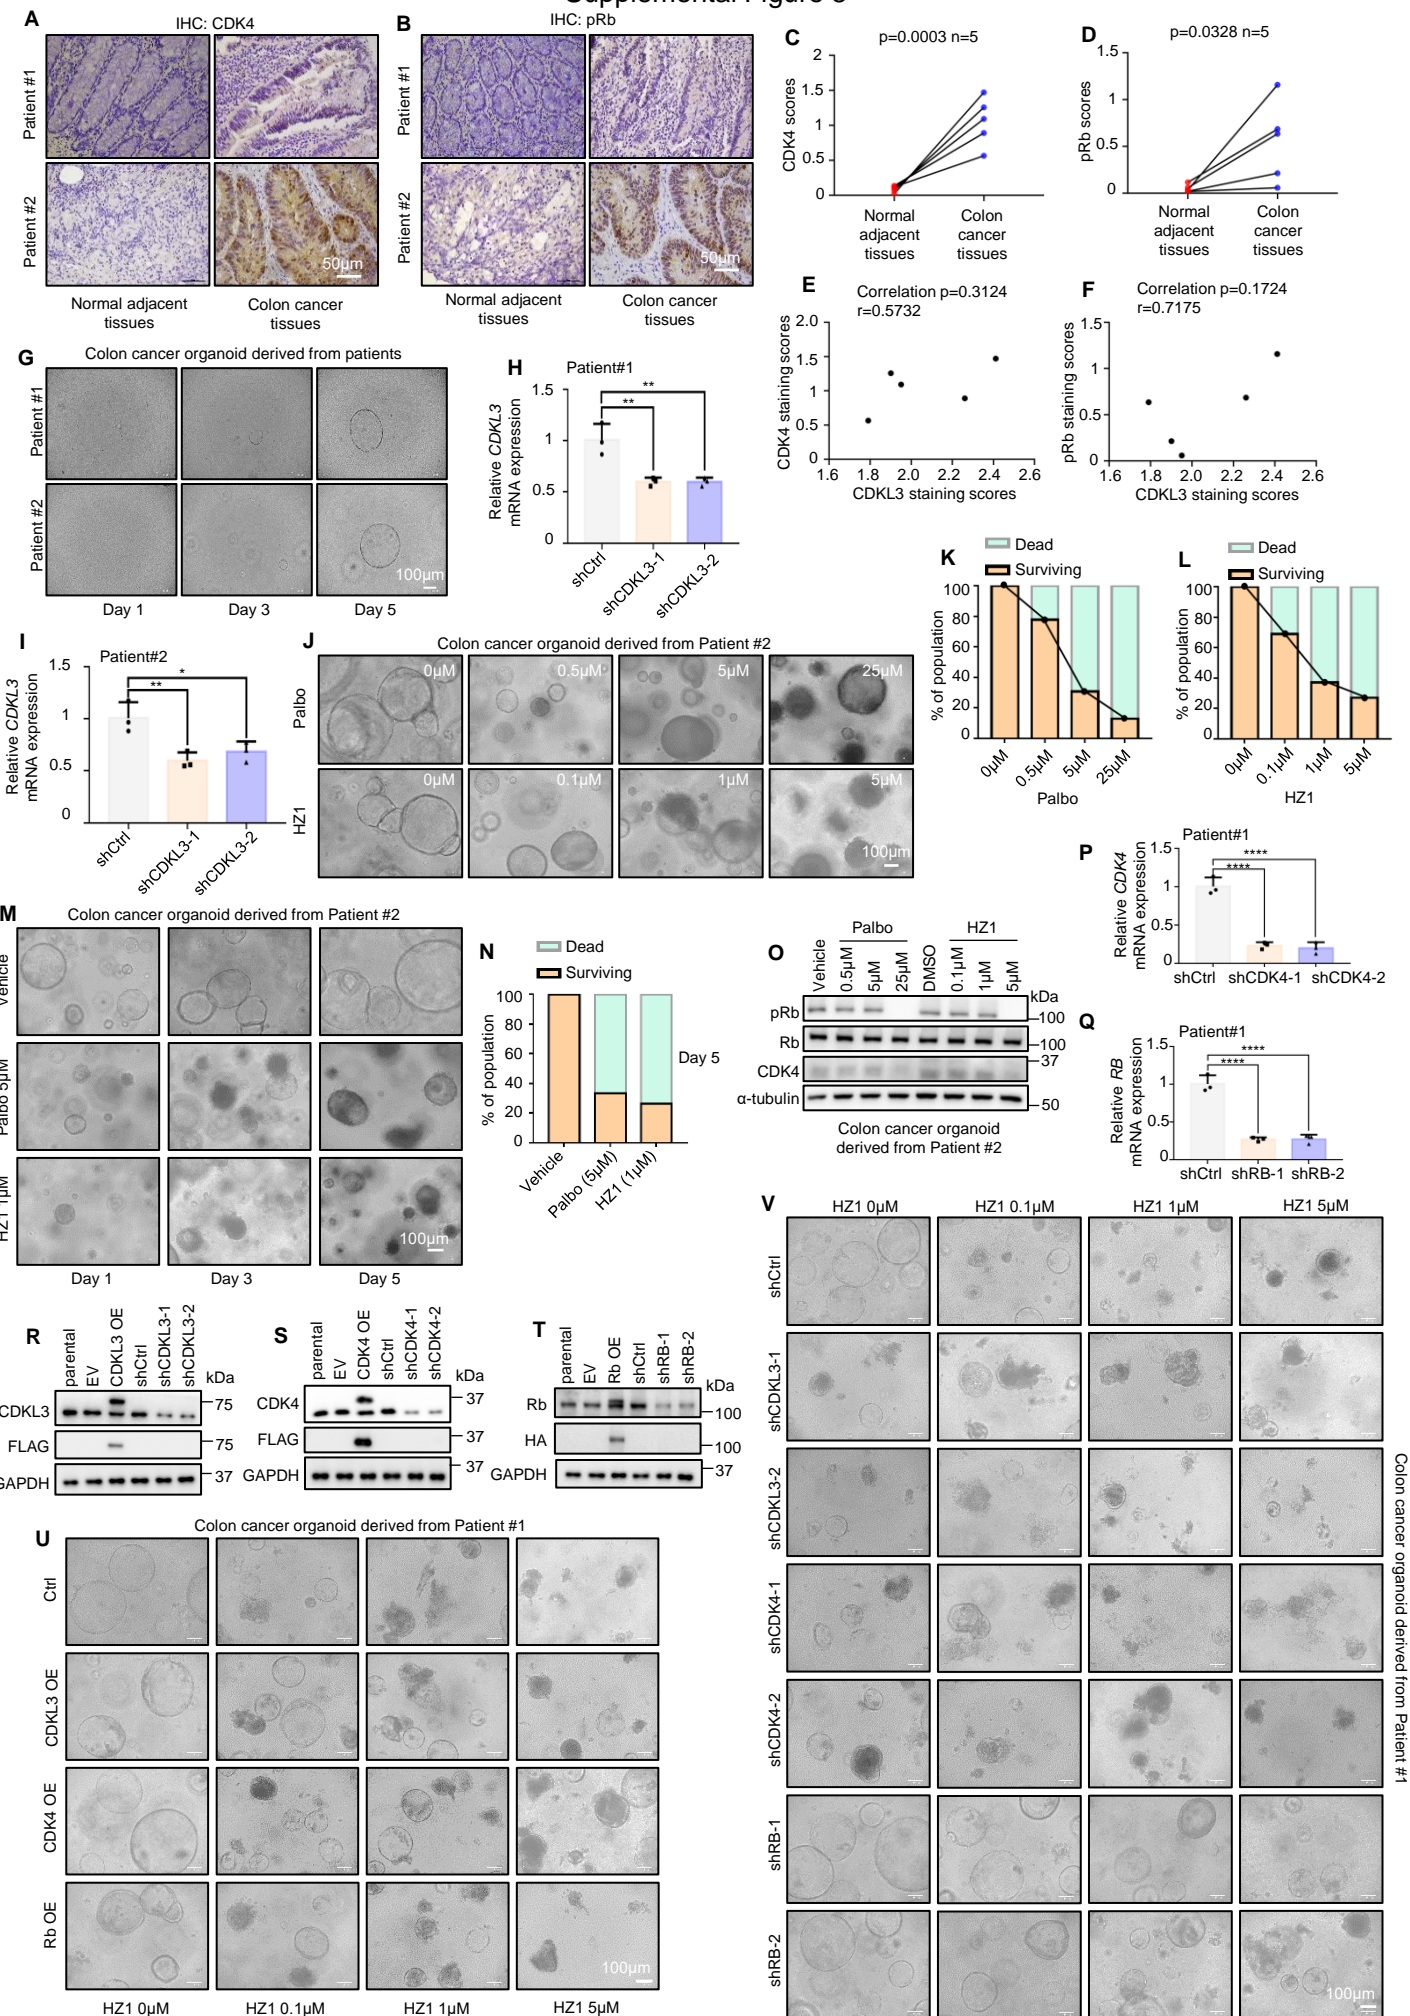



**Supplemental Figure 8. Supporting information showing CDKL3 inhibitor has strong clinical implication in colon cancer treatment.**

(A, B) Representative IHC staining images of CDK4 (A) and pRb (B) in colon cancer patients. (C, D) CDK4 (C) and pRb (D) immunohistochemical scores in colon cancer tissues and normal adjacent tissues. Error bar means  $\pm$  SD, n=5, by two-tailed Student's t-test. (E, F) The correlations of CDKL3 with CDK4 (E) and pRb (F) in colon cancer patients. By two-tailed Spearman correlation analysis. (G) Representative images showing the establishment of patient-derived colon cancer organoids. (H, I) Validation of CDKL3 knockdown in the patient-derived organoids by RT-qPCR. Error bar means  $\pm$  SD, n=3, by one-way ANOVA. (J) Representative images of patient-derived colon cancer organoids#2 under Palbociclib and HZ1 treatments. (K, L) Quantitative analysis of the surviving/dead organoids percentage under Palbociclib (K) and HZ1 (L) treatments in J. (M) Representative images of patient-derived colon cancer organoids#2 under Palbociclib and HZ1 treatments at different time points. (N) Quantitative analysis of the surviving/dead organoids percentage under Palbociclib and HZ1 treatment at Day 5. (O) Immunoblotting assay showing HZ1 decreased the levels of pRb and CDK4 in patient-derived colon cancer organoids#2. (P, Q) Validation of CDK4 (P) and Rb (Q) knockdown in the patient-derived organoid by RT-qPCR. Error bar means  $\pm$  SD, n=3, by one-way ANOVA. (R-T) Immunoblotting validation of overexpression and knockdown of CDKL3 (R), CDK4 (S) and Rb (T) in the patient-derived organoid, respectively. (U, V) Representative images of patient-derived colon cancer organoids#1 under overexpression (U) or knockdown (V) condition of CDKL3/CDK4/Rb, respectively. All images in the same panel are under the same amplification scales. \*, p<0.05; \*\*, p<0.01; \*\*\*\*, p<0.0001.

**Supplemental Table 1. General information of the colon cancer patients.**

| <b>PATIENT</b> | <b>GENDER</b> | <b>AGE</b> | <b>PATHOLOGY</b> | <b>GRADE</b>                         | <b>USED IN ASSAYS</b>    |
|----------------|---------------|------------|------------------|--------------------------------------|--------------------------|
| <b>#1</b>      | Male          | 63         | Adenocarcinoma   | Moderately differentiated, MS-S      | Organoid culture and IHC |
| <b>#2</b>      | Male          | 66         | Adenocarcinoma   | Moderately differentiated, MS-S      | Organoid culture and IHC |
| <b>#3</b>      | Male          | 62         | Adenocarcinoma   | Moderately differentiated, MS-S      | Organoid culture and IHC |
| <b>#4</b>      | Female        | 64         | Adenocarcinoma   | Moderately-well differentiated, MS-S | IHC                      |
| <b>#5</b>      | Female        | 62         | Adenocarcinoma   | Moderately differentiated, MS-S      | IHC                      |

**Supplemental Table 2. Key resources table**

| <b>REAGENT or RESOURCE</b>                                                           | <b>Source</b>             | <b>Identifier</b>      |
|--------------------------------------------------------------------------------------|---------------------------|------------------------|
| <b>Antibodies</b>                                                                    |                           |                        |
| CDKL3 Rabbit pAb                                                                     | ABclonal                  | E16212<br>(customized) |
| Anti-mouse IgG, HRP-linked Antibody                                                  | Cell Signaling Technology | #7076                  |
| Anti-rabbit IgG, HRP-linked Antibody                                                 | Cell Signaling Technology | #7074                  |
| BrdU (Bu20a) Mouse mAb                                                               | Cell Signaling Technology | #5292                  |
| CDK4 (D9G3E) Rabbit mAb                                                              | Cell Signaling Technology | #12790                 |
| CDK4 Mouse mAb                                                                       | Beyotime Biotechnology    | AC251                  |
| CDK2 (78B2) Rabbit mAb                                                               | Cell Signaling Technology | #2546                  |
| CDK6 (D4S8S) Rabbit mAb                                                              | Cell Signaling Technology | #13331                 |
| CDK1 Rabbit mAb                                                                      | Med Chem Express          | HY-P80611              |
| CDK3 Antibody (4B6)                                                                  | Santa Cruz Biotechnology  | sc-81836               |
| p27 Kip1 Antibody (F-8)                                                              | Santa Cruz Biotechnology  | sc-1641                |
| HES1 Rabbit pAb                                                                      | ABclonal                  | A11718                 |
| Cyclin A2 (BF683) Mouse mAb                                                          | Cell Signaling Technology | #4656T                 |
| Cyclin B1 Antibody                                                                   | Cell Signaling Technology | #4138T                 |
| Cyclin D1 (92G2) Rabbit mAb                                                          | Cell Signaling Technology | #2978T                 |
| Cyclin D2 Polyclonal antibody                                                        | Proteintech               | 10934-1-AP             |
| Cyclin D3 Rabbit pAb                                                                 | ABclonal                  | A0746                  |
| Cyclin E1 (HE12) Mouse mAb                                                           | Cell Signaling Technology | #4129T                 |
| Cyclin G1 Polyclonal Antibody                                                        | Invitrogen                | PA5-36050              |
| Cyclin H Antibody                                                                    | Cell Signaling Technology | #2927                  |
| DYKDDDDK Tag (D6W5B) Rabbit mAb                                                      | Cell Signaling Technology | #14793                 |
| HA-Tag (C29F4) Rabbit mAb                                                            | Cell Signaling Technology | #3724                  |
| KAP-1 (C42G12) Rabbit mAb                                                            | Cell Signaling Technology | #4124                  |
| Ki-67 (8D5) Mouse mAb                                                                | Cell Signaling Technology | #9449                  |
| MYC-Tag (9B11) Mouse mAb                                                             | Cell Signaling Technology | #2276                  |
| Phospho-Rb (Ser807/811) Antibody                                                     | Cell Signaling Technology | #9308                  |
| Rb (4H1) Mouse mAb                                                                   | Cell Signaling Technology | #9309                  |
| Ubiquitin Antibody                                                                   | Cell Signaling Technology | #3933                  |
| V5-Tag (D3H8Q) Rabbit mAb                                                            | Cell Signaling Technology | #13202                 |
| Goat anti-mouse IgG (H+L) Highly Cross-Adsorbed Secondary Antibody, Alexa Fluor™ 488 | Invitrogen                | A11029                 |
| Phospho-CDK4-T172 Rabbit pAb                                                         | ABclonal                  | AP0593                 |

|                                                     |                           |              |
|-----------------------------------------------------|---------------------------|--------------|
| Alpha Tubulin Polyclonal antibody                   | Proteintech               | 11224-1-AP   |
| GAPDH Polyclonal antibody                           | Proteintech               | 10494-1-AP   |
| GST(B-14) Mouse mAb                                 | Santa Cruz Biotechnology  | sc-138       |
| <b>Bacterial strain</b>                             |                           |              |
| <i>E. coli</i> NEB® 5-alpha                         | New England Biolabs (NEB) | C2987H       |
| <i>E. coli</i> BL21                                 | New England Biolabs (NEB) | C2530H       |
| <b>Commercial chemicals and biologics/Chemicals</b> |                           |              |
| 4% paraformaldehyde                                 | Beyotime Biotechnology    | P0099        |
| MG132                                               | Beyotime Biotechnology    | S1748        |
| Isopropyl-β-D-thiogalactoside (IPTG)                | Beyotime Biotechnology    | ST098        |
| Penicillin-Streptomycin-Glutamine (100X)            | Gibco                     | 10378016     |
| Puromycin                                           | Invivogen                 | ant-pr-1     |
| Neofect™ DNA transfection reagent                   | Neofect                   | ME201901     |
| Ampicillin                                          | Sangon Biotech            | A100339      |
| Crystal violet                                      | Sangon Biotech            | A100528      |
| Glycerol                                            | Sangon Biotech            | A100854      |
| Glycine                                             | Sangon Biotech            | A110167      |
| Phosphate buffer                                    | Sangon Biotech            | A610100-0001 |
| Sodium dodecyl sulfate                              | Sangon Biotech            | A600485-0500 |
| Polybrene                                           | Santa Cruz Biotechnology  | SC-134220    |
| Palbociclib                                         | Selleckchem               | S4482        |
| Cycloheximide                                       | Sigma-Aldrich             | 239763-M     |
| Cdk1/2 Inhibitor III                                | Sigma-Aldrich             | 217714       |
| IGEPAL® CA-630                                      | Sigma-Aldrich             | I3021        |
| Pyronin Y                                           | Sigma-Aldrich             | P9172        |
| Thiazolyl Blue Tetrazolium Bromide                  | Sigma-Aldrich             | M5655        |
| Thymidine                                           | Sigma-Aldrich             | T1895        |
| Tris[(1-benzyl-1H-1,2,3-triazol-4-yl) methyl] amine | Sigma-Aldrich             | 678937       |
| Triton™ X-100                                       | Sigma-Aldrich             | X100         |
| Hoechst                                             | Thermo                    | 1990363      |
| ATP                                                 | Solarbio                  | A8270        |
| Advanced DMEM/F-12                                  | Gibco                     | 12634028     |
| B-27™ Supplement (50X), minus vitamin A             | Gibco                     | 12587010     |

|                                                                                                      |                     |                 |
|------------------------------------------------------------------------------------------------------|---------------------|-----------------|
| N-2 Supplement (100X)                                                                                | Gibco               | 17502048        |
| EGF Recombinant Mouse Protein                                                                        | Gibco               | PMG8041         |
| N-Acetyl-L-cysteine                                                                                  | Sigma-Aldrich       | A9165           |
| Nicotinamide                                                                                         | Sigma-Aldrich       | N0636           |
| Y-27632                                                                                              | Sigma-Aldrich       | Y0503           |
| HEPES                                                                                                | Beyotime            | ST092           |
| Recombinant Murine Noggin                                                                            | Peprotech           | 250-38          |
| Corning® Matrigel® Growth Factor Reduced (GFR) Basement Membrane Matrix, Phenol Red-free, *LDEV-free | Corning             | 356231          |
| 2,4-dichloropyrimidine                                                                               | Sigma-Aldrich       | 143847          |
| DIPEA                                                                                                | Sigma-Aldrich       | 800894          |
| 3-cyclopentyl-1 <i>H</i> -pyrazol-5-aminetriethylamine                                               | Aladdin             | C175937         |
| CH <sub>2</sub> Cl <sub>2</sub>                                                                      | Sigma-Aldrich       | 40042           |
| <b>Critical commercial assays/kits</b>                                                               |                     |                 |
| BCA Protein Assay Kit                                                                                | Thermo              | 23227           |
| Endo-free Plasmid Mini Kit                                                                           | Omega               | D6950           |
| UNIQ-10 Column Trizol Total RNA Isolation Kit                                                        | Sangon Biotech      | B511321         |
| MonScript™ RTIII All-in-One Mix with dsDNase                                                         | Monad               | MR05101M        |
| MonAmp™ ChemoHS qPCR Mix                                                                             | Monad               | MQ00401S        |
| GeneJET Gel Extraction Kit                                                                           | Thermo              | K0692           |
| GeneJET PCR Purification Kit                                                                         | Thermo              | K0702           |
| UltraSensitive™ SP (Mouse/Rabbit) IHC Kit                                                            | MXB Biotechnologies | KIT-9720        |
| DAB Kit (20×)                                                                                        | MXB Biotechnologies | DAB-0031        |
| Hematoxylin-Eosin (HE) staining Kit                                                                  | BBI LIFE            | E607318         |
| Chemistar™ High-sig ECL Western Blotting Substrate                                                   | Tanon               | 180-5001        |
| RIPA buffer                                                                                          | Cowin Bio           | CW2333          |
| GST Fusion Protein Purification Kit                                                                  | Genscript           | L00206          |
| Ubiquitination Kit                                                                                   | Enzo Life Science   | BML-UW9920-0001 |
| CALNP™ RNAi in vitro                                                                                 | D-Nano Therapeutics | DN001- 01       |
| <b>Experimental models: Cell</b>                                                                     |                     |                 |

|                                            |                                   |                             |
|--------------------------------------------|-----------------------------------|-----------------------------|
| <b>lines</b>                               |                                   |                             |
| HEK293T                                    | ATCC                              | CRL-11268<br>RRID:CVCL_1926 |
| DLD-1                                      | NCACC, China                      | TCHu134                     |
| U2OS                                       | ATCC                              | HTB-96                      |
| HeLa                                       | ATCC                              | CCL-2                       |
| MCF-7                                      | ATCC                              | HTB-22                      |
| MDA-MB-231                                 | ATCC                              | HTB-26                      |
| T47D                                       | ATCC                              | HTB-133                     |
| <b>Experimental models:</b>                |                                   |                             |
| <b>Animals</b>                             |                                   |                             |
| BALB/cA-nude mice                          | Beijing HFK Bioscience<br>CO.,LTD | 13001A                      |
| C57BL/6J- <i>Apc</i> <sup>min/+</sup> mice | GemPharmatech<br>(Nanjing, China) | T001457                     |
| C57BL/6J mice                              | GemPharmatech<br>(Nanjing, China) | 11001A                      |
| <b>Oligonucleotides</b>                    |                                   |                             |
| Control-shRNA sequence                     | This study                        | AAAAAAAAAAAAA<br>AAAAAAAAA  |
| #1-shCyclin A2 sequence<br>(Human)         | This study                        | ATACTTGAGGTA<br>TGGGTCAGC   |
| #2-shCyclin A2 sequence<br>(Human)         | This study                        | TTAACCTCCATTT<br>CCCTAAGG   |
| #1-shCyclin E1 sequence<br>(Human)         | This study                        | ATGACGAGAAAT<br>GATACAAGG   |
| #2-shCyclin E1 sequence<br>(Human)         | This study                        | TAACCAATCCAG<br>AAGAATTGC   |
| #1-shTrim28 sequence<br>(Human)            | This study                        | CCTGGCTCTGTT<br>CTCTGTCCT   |
| #2-shTrim28 sequence<br>(Human)            | This study                        | CTGAGACCAAAC<br>CTGTGCTTA   |
| #1-shCDKL3 sequence<br>(Human)             | This study                        | TTGGTTCTGAGAT<br>ATCTCCTC   |
| #2-shCDKL3 sequence<br>(Human)             | This study                        | GTTAGTTAGATTG<br>ATGGGTGG   |
| #1-shRB sequence (Human)                   | This study                        | TTTGGACTAGAAA<br>TAATGTGG   |
| #2-shRB sequence (Human)                   | This study                        | TTGCAGTAGAATT<br>TACACGCG   |
| #1-RB sgRNA sequence<br>(Human)            | This study                        | GTTCTTTGAGCA<br>ACATGGG     |
| #2-RB sgRNA sequence                       | This study                        | GAACTACTTACGA               |

|                                         |            |                                                                      |
|-----------------------------------------|------------|----------------------------------------------------------------------|
| (Human)                                 |            | ACTGCT                                                               |
| #3-RB sgRNA sequence<br>(Human)         | This study | ACATCTAATGGAC<br>TTCCAG                                              |
| #1-CDKL3 sgRNA sequence<br>(Human)      | This study | GGGCTGTATGAT<br>CATTGAGA                                             |
| #2-CDKL3 sgRNA sequence<br>(Human)      | This study | CAAAATCAAGAA<br>AAACAAG                                              |
| #3-CDKL3 sgRNA sequence<br>(Human)      | This study | TCAATTTGTAAAC<br>AAGCCT                                              |
| #1-CDK4 sgRNA sequence<br>(Human)       | This study | GTCCACATATGC<br>AACACCTG                                             |
| #2-CDK4 sgRNA sequence<br>(Human)       | This study | TCTACATGCTCA<br>AACACCA                                              |
| #3-CDK4 sgRNA sequence<br>(Human)       | This study | CAGTGGCTGAAA<br>TTGGTGT                                              |
| Human <i>GAPDH</i> -RT-qPCR<br>primers  | This study | F:GGAGCGAGAT<br>CCCTCCAAT<br>R:GGCTGTTGTCA<br>TACTTCTCAG             |
| Human <i>CDK4</i> -RT-qPCR<br>primers   | This study | F:ATGGCTACCTC<br>TCGATATGAGC<br>R:CATTGGGGACT<br>CTCACACTCT          |
| Human <i>CCNA2</i> -RT-qPCR<br>primers  | This study | F:CGCTGGCGGT<br>ACTGAAGTC<br>R:GAGGAACGGT<br>GACATGCTCAT             |
| Human <i>CCNE1</i> -RT-qPCR<br>primers  | This study | F:GCCAGCCTTG<br>GGACAATAATG<br>R:CTTGCACGTTG<br>AGTTTGGGT            |
| Human <i>TRIM28</i> -RT-qPCR<br>primers | This study | F:TTTCATGCGTG<br>ATAGTGGCAG<br>R:GCCTCTACACA<br>GGTCTCACAC           |
| Human <i>CDKN2B</i> -RT-qPCR<br>primers | This study | F:TGGGGTGGGA<br>AAGTGGATTGCA<br>R:CCCAGTG CAG<br>AGGTGTT CAGGT<br>CT |
| Human <i>CDKN2A</i> -RT-qPCR<br>primers | This study | F:GCTGCTCACCT<br>CTGGTGCCAAA<br>R:ACCTGCGCAC<br>CATGTTCTCG           |

|                                          |              |                                                                    |
|------------------------------------------|--------------|--------------------------------------------------------------------|
| Human <i>CDKN1B</i> -RT-qPCR primers     | This study   | F:GGTTAGCGGA<br>GCAATGCGCA<br>R:AACCGGCATTT<br>GGGGAACCGTC         |
| Human <i>HES1</i> -RT-qPCR primers       | This study   | F:CCCAGCCAGT<br>GTCAACACGACA<br>R:GGTACCGCCC<br>TTACCTTTCTGTG<br>C |
| Human <i>CCND1</i> -RT-qPCR primers      | This study   | F:GCTGCGAAGT<br>GGAAACCATC<br>R:CCTCCTTCTGC<br>ACACATTTGAA         |
| Mouse Genotyping <i>Apc</i> -PCR primers | This study   | F:ATACTACGGTA<br>TTGCCCAGC<br>R:TGTTGTTGGAT<br>GGTAAGCAC           |
| Control-siRNA                            | GENERAL BIOL | F:UUCUCCGAAC<br>GUGUCACGUTT<br>R:ACGUGACACG<br>UUCGGAGAATT         |
| <i>CCND1</i> (human) siRNA               | GENERAL BIOL | F:AGGAAGAGGA<br>GGAGGAGGATT<br>R:UCCUCCUCCU<br>CCUCUCCUTT          |
| <i>CCND2</i> (human) siRNA               | GENERAL BIOL | F:CCUACAGACG<br>UGCGGGAUATT<br>R:UAUCCCGCAC<br>GUCUGUAGGTT         |
| <i>CCND3</i> (human) siRNA               | GENERAL BIOL | F:CUACAGAUGU<br>CACAGCCAUTT<br>R:AUGGCUGUGA<br>CAUCUGUAGTT         |
| <b>Recombinant DNA</b>                   |              |                                                                    |
| Lenti-EF1 $\alpha$ -puro V5-Ub           | This study   |                                                                    |
| Lenti-EF1 $\alpha$ -puro FLAG-CDKL3      | This study   |                                                                    |
| Lenti-EF1 $\alpha$ -puro MYC-CDKL3       | This study   |                                                                    |
| Lenti-EF1 $\alpha$ -puro GFP-CDKL3       | This study   |                                                                    |
| Lenti-EF1 $\alpha$ -puro tandem GFPs     | This study   |                                                                    |
| Lenti-EF1 $\alpha$ -puro MYC-cyclin A2   | This study   |                                                                    |
| Lenti-EF1 $\alpha$ -puro MYC-cyclin B1   | This study   |                                                                    |
| Lenti-EF1 $\alpha$ -puro MYC-cyclin D1   | This study   |                                                                    |
| Lenti-EF1 $\alpha$ -puro MYC-cyclin E1   | This study   |                                                                    |
| Lenti-EF1 $\alpha$ -puro MYC-cyclin G1   | This study   |                                                                    |



|                                        |            |         |
|----------------------------------------|------------|---------|
| Lenti-EF1 $\alpha$ -puro MYC-cyclin H1 | This study |         |
| pGEX4T-1-Rb 379-928                    | This study |         |
| pGEX4T-1-Rb 792-928                    | This study |         |
| Lenti-EF1 $\alpha$ -puro FLAG-CDK4     | This study |         |
| Lenti-EF1 $\alpha$ -puro MYC-CDK4      | This study |         |
| Lenti-EF1 $\alpha$ -puro FLAG-CDK6     | This study |         |
| Lenti-EF1 $\alpha$ -puro FLAG-CDK7     | This study |         |
| pGEX4T-1-CDK4                          | This study |         |
| Lenti-EF1 $\alpha$ -puro HA-UBE3A      | This study |         |
| Lenti-EF1 $\alpha$ -puro HA-Stub1      | This study |         |
| Lenti-EF1 $\alpha$ -puro HA-Trim28     | This study |         |
| pET28a-Trim28                          | This study |         |
| pGEX4T-1-CDKL3                         | This study |         |
| Lenti-EF1 $\alpha$ -puro FLAG-CDK2     | This study |         |
| Lenti-EF1 $\alpha$ -puro MYC-p16       | This study |         |
| Lenti-EF1 $\alpha$ -puro MYC-p21       | This study |         |
| Lenti-EF1 $\alpha$ -puro MYC-p27       | This study |         |
| Lenti-EF1 $\alpha$ -puro FLAG-CDK1     | This study |         |
| Lenti-EF1 $\alpha$ -puro FLAG-CDK3     | This study |         |
| Lenti-EF1 $\alpha$ -puro MYC-cyclin C  | This study |         |
| Lenti-EF1 $\alpha$ -Blast FLAG-CDKL3   | This study |         |
| Lenti-EF1 $\alpha$ -Blast FLAG-CDK4    | This study |         |
| Lenti-EF1 $\alpha$ -Blast MYC-CDK4     | This study |         |
| pGEX4T-1-CDK4-D158N                    | This study |         |
| pGEX4T-1-CDKL3 Kinase domain (K)       | This study |         |
| pGEX4T-1-CDK2 Kinase domain (K)        | This study |         |
| pET28a-CyclinA2                        | This study |         |
| psPAX2 vector                          | Addgene    | #12260  |
| pCMV-VSV-G                             | Addgene    | #8454   |
| Lenti-Cas9-puro                        | Addgene    | #108100 |
| Lenti-Cas9-puro sgCDKL3#1              | This study |         |
| Lenti-Cas9-puro sgCDKL3#2              | This study |         |
| Lenti-Cas9-puro sgCDKL3#3              | This study |         |
| Lenti-Cas9-puro sgCDK4#1               | This study |         |
| Lenti-Cas9-puro sgCDK4#2               | This study |         |
| Lenti-Cas9-puro sgCDK4#3               | This study |         |
| pLKO-puro shCyclin A2#1                | This study |         |
| pLKO-puro shCyclin A2#2                | This study |         |
| pLKO-puro shCyclin E1#1                | This study |         |
| pLKO-puro shCyclin E1#2                | This study |         |
| pLKO-puro shTrim28#1                   | This study |         |

|                                     |                          |                                                                     |
|-------------------------------------|--------------------------|---------------------------------------------------------------------|
| pLKO-puro shTrim28#2                | This study               |                                                                     |
| Lenti-Cas9-puro sgRB#1              | This study               |                                                                     |
| Lenti-Cas9-puro sgRB#2              | This study               |                                                                     |
| Lenti-Cas9-puro sgRB#3              | This study               |                                                                     |
| pLKO-puro shRB#1                    | This study               |                                                                     |
| pLKO-puro shRB#2                    | This study               |                                                                     |
| <b>Software and algorithms</b>      |                          |                                                                     |
| Graphpad Prism 8                    | Graphpad software        | <a href="https://www.graphpad.com">https://www.graphpad.com</a>     |
| ImageJ                              |                          | <a href="https://imagej.nih.gov/ij/">https://imagej.nih.gov/ij/</a> |
| FlowJo version 10.0.7r2             | BD Biosciences           | <a href="https://www.flowjo.com">https://www.flowjo.com</a>         |
| <b>Other</b>                        |                          |                                                                     |
| PVDF                                | Millipore                | IPVH00010                                                           |
| Protein G Plus-Agarose              | Santa Cruz Biotechnology | SC-2002                                                             |
| $\alpha$ -MYC Agarose Affinity Gel  | Sigma-Aldrich            | 7470                                                                |
| $\alpha$ -FLAG Agarose Affinity Gel | Sigma-Aldrich            | 4596                                                                |
| $\alpha$ -HA Agarose Affinity Gel   | Sigma-Aldrich            | A2095                                                               |
| EQKLISEEDL (MYC-tag) peptide        | Sangon Biotech           | Custom synthesis                                                    |
| DYKDDDDK (FLAG-tag) peptide         | Sangon Biotech           | T510060-0005                                                        |
| High Affinity Ni-NTA Resin          | Genscript                | L00250                                                              |
| Glutathione Resin                   | Genscript                | L00206                                                              |
| Streptavidin Resin                  | Pierce                   | 20349                                                               |

## References

1. Geng Y, Yu Q, Sicinska E, Das M, Schneider JE, Bhattacharya S, et al. Cyclin E ablation in the mouse. *Cell*. 2003;114(4):431-43.
2. Kalaszczyńska I, Geng Y, Iino T, Mizuno SI, Choi Y, Kondratiuk I, et al. Cyclin A Is Redundant in Fibroblasts but Essential in Hematopoietic and Embryonic Stem Cells. *Cell*. 2009;138(2):352-65.
3. Liu L, Michowski W, Inuzuka H, Shimizu K, Nihira NT, Chick JM, et al. G1 cyclins link proliferation, pluripotency and differentiation of embryonic stem cells. *Nature cell biology*. 2017;19(3):177-88.
4. Darzynkiewicz Z, Sharpless T, Staiano-Coico L, and Melamed MR. Subcompartments of the G1 phase of cell cycle detected by flow cytometry. *Proceedings of the National Academy of Sciences of the United States of America*. 1980;77(11):6696-9.
5. Crissman HA, Darzynkiewicz Z, Tobey RA, and Steinkamp JA. Correlated measurements of DNA, RNA, and protein in individual cells by flow cytometry. *Science*. 1985;228(4705):1321-4.
6. Darzynkiewicz Z. Simultaneous analysis of cellular RNA and DNA content. *Methods Cell Biol*. 1994;41:401-20.
7. van de Wetering M, Francies HE, Francis JM, Bounova G, Iorio F, Pronk A, et al. Prospective derivation of a living organoid biobank of colorectal cancer patients. *Cell*. 2015;161(4):933-45.
